# Supplementary material for: The Lyavaraka Ultrabasic Complex, Serpentinite Belt, Kola Peninsula, Russia
Source: MDPI journal article supplement (doi:10.3390/geosciences12090323), 2022-08-29
Supplement: s1 [file s1]

SUPPLEMENTARY TABLE S1. COMPOSITIONS OF OLIVINE  
FROM THE LYAVARAKA COMPLEX, KOLA PENINSULA

| #  | Sample | SiO <sub>2</sub> | FeO   | MnO  | MgO   | CaO  | NiO  | Total  | Mg#  |
|----|--------|------------------|-------|------|-------|------|------|--------|------|
| 1  | LVR28  | 38.27            | 22.72 | 0.27 | 38.10 | 0    | 0.37 | 99.72  | 74.7 |
| 2  | LVR28  | 38.31            | 22.45 | 0.26 | 37.98 | 0.01 | 0.38 | 99.38  | 74.9 |
| 3  | LVR28  | 38.40            | 22.92 | 0.27 | 38.11 | 0.01 | 0.40 | 100.12 | 74.5 |
| 4  | LVR28  | 38.30            | 22.84 | 0.25 | 38.39 | 0.01 | 0.42 | 100.21 | 74.8 |
| 5  | LVR28A | 38.26            | 22.06 | 0.24 | 39.10 | 0    | 0.41 | 100.07 | 75.8 |
| 6  | LVR28A | 38.45            | 22.20 | 0.23 | 38.79 | 0.02 | 0.42 | 100.11 | 75.5 |
| 7  | LVR28A | 38.65            | 22.03 | 0.24 | 38.75 | 0    | 0.42 | 100.09 | 75.6 |
| 8  | LVR30  | 40.87            | 10.13 | 0.10 | 48.32 | 0    | 0.36 | 99.78  | 89.4 |
| 9  | LVR30  | 40.91            | 9.94  | 0.12 | 48.51 | 0.01 | 0.37 | 99.87  | 89.6 |
| 10 | LVR30A | 40.72            | 10.12 | 0.11 | 47.94 | 0    | 0.41 | 99.29  | 89.3 |
| 11 | LVR30A | 40.68            | 10.33 | 0.11 | 47.92 | 0.01 | 0.47 | 99.52  | 89.1 |
| 12 | LVR30A | 40.63            | 10.19 | 0.11 | 48.25 | 0    | 0.44 | 99.62  | 89.3 |
| 13 | LVR30A | 40.42            | 10.25 | 0.11 | 48.16 | 0.01 | 0.44 | 99.38  | 89.2 |
| 14 | LVR31A | 40.62            | 10.36 | 0.14 | 48.17 | 0    | 0.59 | 99.89  | 89.1 |
| 15 | LVR35  | 40.67            | 9.49  | 0.12 | 49.04 | 0.01 | 0.40 | 99.73  | 90.1 |
| 16 | LVR35  | 40.50            | 9.44  | 0.12 | 48.54 | 0.01 | 0.40 | 99.01  | 90.0 |
| 17 | LVR35  | 40.72            | 9.48  | 0.12 | 48.72 | 0    | 0.40 | 99.43  | 90.1 |
| 18 | LVR35A | 41.01            | 9.54  | 0.13 | 48.84 | 0    | 0.40 | 99.93  | 90.0 |
| 19 | LVR35A | 40.89            | 9.53  | 0.11 | 49.12 | 0.01 | 0.38 | 100.02 | 90.1 |
| 20 | LVR35A | 41.26            | 9.17  | 0.12 | 48.47 | 0    | 0.40 | 99.42  | 90.3 |

Note: The results of wavelength-dispersion electron-microprobe analyses are quoted in weight %. A zero implies below detection limit. Mg# is defined as 100Mg/(Mg + Fe + Mn).

SUPPLEMENTARY TABLE S2. COMPOSITIONS OF ORTHOPYROXENE FROM THE LYAVARAKA COMPLEX, KOLA PENINSULA

| #  | Sample | SiO <sub>2</sub> | TiO <sub>2</sub> | Al <sub>2</sub> O <sub>3</sub> | Cr <sub>2</sub> O <sub>3</sub> | FeO   | MnO  | MgO   | CaO  | Na <sub>2</sub> O | Total | Wo  | En   | Fs   | Aeg | Mg#  |
|----|--------|------------------|------------------|--------------------------------|--------------------------------|-------|------|-------|------|-------------------|-------|-----|------|------|-----|------|
| 1  | LVR1   | 55.32            | 0.05             | 2.70                           | 0.27                           | 10.70 | 0.29 | 30.28 | 0.13 | 0.02              | 99.7  | 0.3 | 82.8 | 16.9 | 0.1 | 81.9 |
| 2  | LVR1A  | 55.66            | 0.04             | 2.48                           | 0.25                           | 10.51 | 0.30 | 30.72 | 0.14 | 0.02              | 100.0 | 0.3 | 83.2 | 16.4 | 0.1 | 82.6 |
| 3  | LVR2   | 58.34            | 0.02             | 0.54                           | 0.06                           | 6.32  | 0.15 | 34.20 | 0.12 | 0.02              | 99.8  | 0.2 | 90.1 | 9.6  | 0.1 | 87.7 |
| 4  | LVR2A  | 58.75            | 0.03             | 0.50                           | 0.07                           | 6.14  | 0.15 | 34.09 | 0.10 | 0.01              | 99.8  | 0.2 | 90.4 | 9.4  | 0.0 | 86.7 |
| 5  | LVR3   | 58.75            | 0.03             | 0.22                           | 0.06                           | 5.02  | 0.15 | 35.62 | 0.16 | 0.03              | 100.0 | 0.3 | 92.1 | 7.5  | 0.1 | 90.8 |
| 6  | LVR3A  | 57.83            | 0.01             | 0.05                           | 0.02                           | 6.04  | 0.26 | 35.93 | 0.13 | 0.02              | 100.0 | 0.2 | 90.8 | 8.9  | 0.1 | 93.0 |
| 7  | LVR4   | 56.70            | 0.04             | 0.88                           | 0.19                           | 7.66  | 0.13 | 34.27 | 0.11 | 0.02              | 100.0 | 0.2 | 88.4 | 11.3 | 0.1 | 90.4 |
| 8  | LVR4A  | 57.27            | 0.03             | 0.64                           | 0.13                           | 7.47  | 0.15 | 34.29 | 0.09 | 0                 | 100.0 | 0.2 | 88.7 | 11.1 | 0.0 | 89.4 |
| 9  | LVR5   | 56.49            | 0.03             | 0.79                           | 0.13                           | 9.12  | 0.21 | 32.37 | 0.13 | 0                 | 99.3  | 0.3 | 85.9 | 13.9 | 0.0 | 85.6 |
| 10 | LVR5A  | 57.25            | 0.05             | 0.98                           | 0.18                           | 8.95  | 0.22 | 32.54 | 0.14 | 0.02              | 100.0 | 0.3 | 86.1 | 13.6 | 0.1 | 85.0 |
| 11 | LVR7   | 57.31            | 0.04             | 0.97                           | 0.15                           | 8.43  | 0.19 | 33.05 | 0.13 | 0                 | 100.0 | 0.2 | 87.0 | 12.7 | 0.0 | 86.1 |
| 12 | LVR7A  | 56.60            | 0.03             | 1.85                           | 0.31                           | 8.62  | 0.18 | 32.83 | 0.12 | 0                 | 101.0 | 0.2 | 86.7 | 13.0 | 0.0 | 86.7 |
| 13 | LVR8   | 57.71            | 0.04             | 1.15                           | 0.13                           | 8.53  | 0.19 | 32.50 | 0.13 | 0                 | 100.0 | 0.2 | 86.7 | 13.1 | 0.0 | 84.1 |
| 14 | LVR8A  | 57.17            | 0.05             | 1.13                           | 0.17                           | 8.72  | 0.19 | 32.38 | 0.13 | 0.02              | 100.0 | 0.2 | 86.4 | 13.3 | 0.1 | 84.7 |
| 15 | LVR10A | 56.71            | 0.04             | 1.33                           | 0.21                           | 8.58  | 0.18 | 32.27 | 0.13 | 0.04              | 99.5  | 0.3 | 86.4 | 13.2 | 0.1 | 85.2 |
| 16 | LVR11A | 57.36            | 0.05             | 1.14                           | 0.20                           | 8.14  | 0.16 | 33.02 | 0.10 | 0.01              | 100.0 | 0.2 | 87.4 | 12.3 | 0.0 | 86.0 |
| 17 | LVR12  | 58.20            | 0.02             | 0.64                           | 0.13                           | 6.96  | 0.15 | 33.05 | 0.06 | 0.02              | 99.2  | 0.1 | 89.1 | 10.8 | 0.1 | 84.8 |
| 18 | LVR13A | 57.79            | 0.03             | 0.69                           | 0.24                           | 7.20  | 0.16 | 32.93 | 0.30 | 0.01              | 99.4  | 0.6 | 88.3 | 11.1 | 0.0 | 85.5 |
| 19 | LVR14A | 57.15            | 0.06             | 0.71                           | 0.12                           | 8.87  | 0.21 | 33.05 | 0.10 | 0.02              | 100.0 | 0.2 | 86.4 | 13.3 | 0.1 | 86.5 |
| 20 | LVR15  | 57.41            | 0.04             | 0.76                           | 0.19                           | 7.00  | 0.16 | 34.61 | 0.17 | 0.06              | 100.0 | 0.3 | 89.1 | 10.3 | 0.2 | 90.5 |
| 21 | LVR15A | 57.47            | 0.04             | 0.66                           | 0.14                           | 7.08  | 0.18 | 34.50 | 0.11 | 0.05              | 100.0 | 0.2 | 89.1 | 10.5 | 0.2 | 90.0 |
| 22 | LVR16A | 57.85            | 0.05             | 0.54                           | 0.14                           | 6.86  | 0.18 | 33.95 | 0.11 | 0                 | 99.7  | 0.2 | 89.4 | 10.4 | 0.0 | 87.6 |
| 23 | LVR17  | 57.85            | 0.02             | 0.62                           | 0.12                           | 6.88  | 0.16 | 34.61 | 0.10 | 0.02              | 100.0 | 0.2 | 89.5 | 10.2 | 0.1 | 89.5 |
| 24 | LVR17A | 57.60            | 0.03             | 0.69                           | 0.21                           | 7.05  | 0.18 | 34.36 | 0.14 | 0                 | 100.0 | 0.3 | 89.2 | 10.5 | 0.0 | 89.2 |
| 25 | LVR18  | 56.79            | 0.02             | 1.21                           | 0.20                           | 9.74  | 0.21 | 32.01 | 0.05 | 0.04              | 100.0 | 0.1 | 84.9 | 14.8 | 0.1 | 84.4 |
| 26 | LVR19A | 55.61            | 0.02             | 1.48                           | 0.36                           | 10.36 | 0.21 | 30.93 | 0.11 | 0.02              | 99.1  | 0.2 | 83.7 | 16.1 | 0.1 | 83.2 |
| 27 | LVR20A | 56.15            | 0.01             | 1.70                           | 0.36                           | 10.68 | 0.22 | 31.11 | 0.06 | 0.06              | 100.0 | 0.1 | 83.3 | 16.4 | 0.2 | 83.1 |
| 28 | LVR21A | 55.12            | 0.04             | 1.85                           | 0.49                           | 11.46 | 0.22 | 28.63 | 1.44 | 0.06              | 99.3  | 2.8 | 78.9 | 18.1 | 0.2 | 80.0 |
| 29 | LVR22  | 56.6             | 0.04             | 1.05                           | 0.15                           | 9.17  | 0.18 | 32.45 | 0.12 | 0                 | 99.7  | 0.2 | 85.9 | 13.9 | 0.0 | 85.7 |
| 30 | LVR22  | 56.5             | 0.05             | 1.06                           | 0.17                           | 9.20  | 0.21 | 33.08 | 0.14 | 0                 | 100.0 | 0.3 | 86.0 | 13.7 | 0.0 | 87.4 |
| 31 | LVR23  | 57.9             | 0.01             | 0.39                           | 0.05                           | 7.60  | 0.20 | 33.72 | 0.11 | 0.03              | 100.0 | 0.2 | 88.3 | 11.4 | 0.1 | 87.2 |
| 32 | LVR25  | 56.4             | 0.03             | 1.05                           | 0.14                           | 8.01  | 0.20 | 33.38 | 0.10 | 0                 | 99.3  | 0.2 | 87.7 | 12.1 | 0.0 | 88.5 |
| 33 | LVR25A | 57.1             | 0.04             | 1.03                           | 0.11                           | 8.07  | 0.19 | 33.38 | 0.13 | 0                 | 100.0 | 0.3 | 87.6 | 12.2 | 0.0 | 87.3 |
| 34 | LVR26  | 56.2             | 0.05             | 0.98                           | 0.20                           | 10.77 | 0.24 | 31.72 | 0.16 | 0                 | 100.0 | 0.3 | 83.4 | 16.3 | 0.0 | 84.4 |

|    |        |      |      |      |      |       |      |       |      |      |       |     |      |      |     |      |
|----|--------|------|------|------|------|-------|------|-------|------|------|-------|-----|------|------|-----|------|
| 35 | LVR26A | 56.1 | 0.02 | 0.89 | 0.15 | 10.74 | 0.25 | 31.29 | 0.14 | 0.03 | 99.6  | 0.3 | 83.2 | 16.4 | 0.1 | 83.6 |
| 36 | LVR27  | 57.6 | 0.04 | 0.70 | 0.07 | 7.11  | 0.21 | 34.04 | 0.11 | 0    | 99.8  | 0.2 | 89.0 | 10.7 | 0.0 | 88.3 |
| 37 | LVR27A | 57.2 | 0.02 | 0.91 | 0.13 | 7.04  | 0.19 | 34.09 | 0.08 | 0    | 99.6  | 0.2 | 89.2 | 10.6 | 0.0 | 89.0 |
| 38 | LVR28  | 55.8 | 0.04 | 0.91 | 0.08 | 14.29 | 0.29 | 28.75 | 0.25 | 0.02 | 100.0 | 0.5 | 77.4 | 22.0 | 0.1 | 77.2 |
| 39 | LVR29  | 56.8 | 0.04 | 0.72 | 0.15 | 7.09  | 0.16 | 34.24 | 0.14 | 0.01 | 99.3  | 0.3 | 89.1 | 10.6 | 0.0 | 90.1 |
| 40 | LVR29A | 57.2 | 0.05 | 0.59 | 0.13 | 6.94  | 0.18 | 35.26 | 0.06 | 0    | 100.0 | 0.1 | 89.7 | 10.2 | 0.0 | 92.0 |
| 41 | LVR30  | 57.2 | 0.05 | 0.17 | 0.07 | 7.67  | 0.17 | 34.80 | 0.14 | 0.01 | 100.0 | 0.3 | 88.5 | 11.2 | 0.0 | 91.0 |
| 42 | LVR30A | 57.5 | 0.01 | 0.17 | 0.07 | 7.38  | 0.13 | 35.03 | 0.08 | 0    | 100.0 | 0.1 | 89.1 | 10.7 | 0.0 | 91.0 |
| 43 | LVR31A | 57.6 | 0.03 | 0.34 | 0.08 | 7.18  | 0.17 | 33.87 | 0.12 | 0.01 | 99.3  | 0.2 | 88.9 | 10.8 | 0.0 | 88.0 |
| 44 | LVR32  | 57.2 | 0.03 | 0.76 | 0.19 | 7.13  | 0.16 | 33.82 | 0.08 | 0.01 | 99.3  | 0.1 | 89.0 | 10.8 | 0.0 | 88.4 |
| 45 | LVR32A | 57.3 | 0.04 | 0.81 | 0.24 | 7.22  | 0.16 | 34.08 | 0.10 | 0.03 | 99.9  | 0.2 | 88.9 | 10.8 | 0.1 | 89.1 |
| 46 | LVR33  | 57.1 | 0.05 | 0.82 | 0.24 | 7.28  | 0.17 | 33.63 | 0.12 | 0.04 | 99.5  | 0.2 | 88.6 | 11.0 | 0.1 | 88.2 |
| 47 | LVR33A | 56.8 | 0.04 | 0.88 | 0.36 | 7.34  | 0.18 | 33.34 | 0.14 | 0.03 | 99.2  | 0.3 | 88.5 | 11.2 | 0.1 | 87.8 |
| 48 | LVR34  | 57.1 | 0.04 | 0.63 | 0.14 | 7.75  | 0.18 | 33.73 | 0.07 | 0.04 | 99.7  | 0.1 | 88.1 | 11.6 | 0.1 | 88.4 |
| 49 | LVR34A | 57.9 | 0.04 | 0.60 | 0.14 | 7.68  | 0.19 | 33.16 | 0.15 | 0.01 | 99.9  | 0.3 | 88.0 | 11.7 | 0.0 | 85.6 |
| 50 | LVR35  | 57.6 | 0.01 | 0.48 | 0.05 | 6.56  | 0.16 | 34.09 | 0.06 | 0.05 | 99.1  | 0.1 | 89.8 | 9.9  | 0.2 | 88.6 |
| 51 | LVR35A | 58.5 | 0.00 | 0.09 | 0.02 | 6.21  | 0.18 | 34.37 | 0.11 | 0.04 | 99.6  | 0.2 | 90.3 | 9.4  | 0.1 | 87.9 |
| 52 | LVR36  | 56.8 | 0.05 | 0.94 | 0.19 | 7.92  | 0.20 | 33.15 | 0.18 | 0.01 | 99.4  | 0.3 | 87.6 | 12.0 | 0.0 | 87.4 |
| 53 | LVR36A | 56.3 | 0.04 | 0.98 | 0.27 | 8.08  | 0.21 | 33.11 | 0.13 | 0.03 | 99.2  | 0.3 | 87.4 | 12.3 | 0.1 | 88.0 |
| 54 | LVR37  | 56.5 | 0.05 | 1.51 | 0.18 | 9.28  | 0.24 | 31.76 | 0.13 | 0.02 | 99.7  | 0.3 | 85.3 | 14.4 | 0.1 | 84.1 |
| 55 | LVR37A | 56.3 | 0.04 | 2.18 | 0.13 | 9.26  | 0.23 | 31.01 | 0.13 | 0    | 99.3  | 0.3 | 85.1 | 14.6 | 0.0 | 82.3 |
| 56 | LVR38  | 57.6 | 0.03 | 0.75 | 0.19 | 7.46  | 0.20 | 33.60 | 0.14 | 0    | 99.9  | 0.3 | 88.4 | 11.3 | 0.0 | 87.2 |
| 57 | LVR38A | 57.6 | 0.03 | 0.84 | 0.23 | 7.51  | 0.20 | 33.14 | 0.15 | 0.01 | 99.7  | 0.3 | 88.2 | 11.5 | 0.0 | 86.1 |
| 58 | LVR39  | 55.8 | 0.05 | 1.53 | 1.57 | 8.12  | 0.17 | 32.04 | 0.51 | 0    | 99.8  | 1   | 86.5 | 12.5 | 0.0 | 86.5 |
| 59 | LVR39A | 56.8 | 0.03 | 1.42 | 0.52 | 7.76  | 0.18 | 32.80 | 0.53 | 0.05 | 100.0 | 1   | 87.0 | 11.8 | 0.2 | 87.3 |
| 60 | LVR40  | 57.2 | 0.04 | 0.84 | 0.34 | 7.38  | 0.17 | 33.60 | 0.09 | 0    | 99.6  | 0.2 | 88.6 | 11.2 | 0.0 | 87.7 |
| 61 | LVR40A | 57.1 | 0.02 | 1.11 | 0.35 | 7.45  | 0.19 | 33.79 | 0.12 | 0.02 | 100.0 | 0.2 | 88.5 | 11.2 | 0.1 | 88.6 |
| 62 | LVR41  | 57.3 | 0.03 | 0.94 | 0.26 | 7.76  | 0.18 | 32.94 | 0.14 | 0.04 | 99.6  | 0.3 | 87.7 | 11.9 | 0.1 | 86.1 |
| 63 | LVR42  | 57.5 | 0.01 | 0.92 | 0.15 | 7.69  | 0.19 | 33.69 | 0.07 | 0.02 | 100.0 | 0.1 | 88.2 | 11.6 | 0.1 | 87.7 |
| 64 | LVR42A | 57.6 | 0.02 | 0.96 | 0.26 | 7.62  | 0.19 | 32.93 | 0.12 | 0.06 | 99.7  | 0.2 | 87.8 | 11.7 | 0.2 | 85.9 |
| 65 | LVR43  | 57.6 | 0.03 | 0.86 | 0.22 | 7.68  | 0.18 | 32.95 | 0.06 | 0    | 99.6  | 0.1 | 88.1 | 11.8 | 0.0 | 85.4 |
| 66 | LVR43A | 57.9 | 0.03 | 0.87 | 0.22 | 7.62  | 0.18 | 32.85 | 0.07 | 0    | 99.8  | 0.1 | 88.1 | 11.7 | 0.0 | 84.7 |
| 67 | LVR44  | 57   | 0.03 | 1.16 | 0.33 | 7.80  | 0.18 | 32.86 | 0.10 | 0.04 | 99.5  | 0.2 | 87.7 | 12.0 | 0.1 | 86.3 |
| 68 | LVR44A | 56.6 | 0.03 | 1.03 | 0.57 | 7.89  | 0.17 | 33.17 | 0.08 | 0.01 | 99.6  | 0.2 | 87.8 | 12.0 | 0.0 | 87.5 |
| 69 | LVR45  | 56.4 | 0.03 | 1.26 | 0.84 | 7.95  | 0.18 | 32.86 | 0.10 | 0    | 99.6  | 0.2 | 87.6 | 12.2 | 0.0 | 87.0 |

Note: The results of wavelength-dispersion electron-microprobe analyses are quoted in weight %. A zero implies below detection limit. Potassium was not detected ( $\leq 0.01$  wt.% K<sub>2</sub>O). Mg# is defined as 100Mg/(Mg + Fe + Mn).

SUPPLEMENTARY TABLE S3. COMPOSITIONS OF CLINOPYROXENE FROM THE LYAVARAKA COMPLEX, KOLA PENINSULA

| #  | Sample | SiO <sub>2</sub> | TiO <sub>2</sub> | Al <sub>2</sub> O <sub>3</sub> | Cr <sub>2</sub> O <sub>3</sub> | FeO  | MnO  | MgO   | CaO   | Na <sub>2</sub> O | K <sub>2</sub> O | Total  | Wo   | En   | Fs  | Aeg | Mg#  |
|----|--------|------------------|------------------|--------------------------------|--------------------------------|------|------|-------|-------|-------------------|------------------|--------|------|------|-----|-----|------|
| 1  | LVR21A | 53.50            | 0.20             | 2.53                           | 0.49                           | 3.77 | 0.12 | 15.18 | 22.93 | 0.75              | 0.00             | 99.47  | 47.3 | 43.6 | 6.3 | 2.8 | 86.5 |
| 2  | LVR21A | 53.50            | 0.20             | 2.60                           | 0.48                           | 3.75 | 0.13 | 15.24 | 22.83 | 0.81              | 0.00             | 99.54  | 47.1 | 43.7 | 6.2 | 3.0 | 87.2 |
| 3  | LVR21A | 53.60            | 0.17             | 2.32                           | 0.51                           | 3.75 | 0.13 | 15.24 | 22.91 | 0.77              | 0.01             | 99.38  | 47.2 | 43.7 | 6.2 | 2.9 | 86.9 |
| 4  | LVR21A | 53.60            | 0.15             | 2.23                           | 0.47                           | 3.58 | 0.13 | 15.36 | 23.29 | 0.71              | 0.01             | 99.57  | 47.7 | 43.8 | 5.9 | 2.6 | 88.0 |
| 5  | LVR21A | 53.70            | 0.18             | 2.25                           | 0.43                           | 4.11 | 0.15 | 15.96 | 22.35 | 0.66              | 0.00             | 99.78  | 45.8 | 45.2 | 6.8 | 2.4 | 87.2 |
| 6  | LVR28  | 53.68            | 0.21             | 2.30                           | 0.36                           | 4.21 | 0.12 | 14.91 | 23.14 | 0.62              | 0.00             | 99.54  | 47.8 | 42.9 | 7.0 | 2.3 | 83.4 |
| 7  | LVR28  | 53.65            | 0.20             | 2.09                           | 0.32                           | 4.20 | 0.12 | 15.11 | 23.16 | 0.58              | 0.00             | 99.42  | 47.8 | 43.3 | 6.9 | 2.2 | 84.2 |
| 8  | LVR28  | 53.78            | 0.19             | 1.98                           | 0.61                           | 4.49 | 0.13 | 15.37 | 22.68 | 0.56              | 0.01             | 99.80  | 46.6 | 43.9 | 7.4 | 2.1 | 83.6 |
| 9  | LVR28  | 53.80            | 0.20             | 1.97                           | 0.61                           | 4.47 | 0.13 | 15.58 | 22.73 | 0.66              | 0.01             | 100.16 | 46.2 | 44.1 | 7.3 | 2.4 | 85.9 |
| 10 | LVR28  | 53.81            | 0.16             | 1.63                           | 0.42                           | 4.99 | 0.15 | 15.20 | 22.30 | 0.54              | 0.00             | 99.20  | 46.0 | 43.7 | 8.3 | 2.0 | 81.1 |
| 11 | LVR28A | 53.77            | 0.14             | 1.85                           | 0.74                           | 4.45 | 0.13 | 15.66 | 22.32 | 0.77              | 0.00             | 99.84  | 45.5 | 44.4 | 7.3 | 2.8 | 86.6 |
| 12 | LVR28A | 53.78            | 0.17             | 1.93                           | 0.55                           | 4.42 | 0.14 | 15.65 | 22.40 | 0.79              | 0.00             | 99.83  | 45.6 | 44.3 | 7.2 | 2.9 | 86.9 |
| 13 | LVR28A | 53.87            | 0.11             | 2.05                           | 0.55                           | 4.17 | 0.12 | 15.61 | 22.70 | 0.75              | 0.00             | 99.92  | 46.2 | 44.2 | 6.8 | 2.8 | 87.1 |
| 14 | LVR28A | 53.65            | 0.18             | 2.02                           | 0.59                           | 4.35 | 0.14 | 15.68 | 22.40 | 0.77              | 0.02             | 99.79  | 45.7 | 44.4 | 7.1 | 2.8 | 87.4 |
| 15 | LVR28A | 53.54            | 0.20             | 1.96                           | 0.66                           | 4.42 | 0.14 | 15.49 | 22.17 | 0.82              | 0.00             | 99.41  | 45.4 | 44.2 | 7.3 | 3.1 | 86.4 |

The results of wavelength-dispersion electron-microprobe analyses are quoted in weight %. Mg# is defined as 100Mg/(Mg + Fe + Mn). Symbols: Aeg: aegirine, En: enstatite, Fs: ferrosilite, Wo: wollastonite. The proportion of the components are quoted in mol.%.

SUPPLEMENTARY TABLE S4. COMPOSITIONS OF PLAGIOCLASE  
FROM THE LYAVARAKA COMPLEX, KOLA PENINSULA

| #  | Sample | SiO <sub>2</sub> | Al <sub>2</sub> O <sub>3</sub> | FeO  | CaO   | Na <sub>2</sub> O | K <sub>2</sub> O | Total  | Or  | Ab   | An   |
|----|--------|------------------|--------------------------------|------|-------|-------------------|------------------|--------|-----|------|------|
| 1  | LVR18  | 58.27            | 25.56                          | 0.03 | 7.66  | 7.80              | 0.03             | 99.35  | 0.2 | 64.7 | 35.1 |
| 2  | LVR18  | 61.14            | 24.09                          | 0.04 | 5.65  | 9.47              | 0.03             | 100.42 | 0.2 | 75.1 | 24.8 |
| 3  | LVR18  | 60.41            | 24.63                          | 0.04 | 6.62  | 8.19              | 0.03             | 99.93  | 0.2 | 69.0 | 30.8 |
| 4  | LVR19  | 61.17            | 23.57                          | 0.17 | 5.13  | 9.38              | 0.06             | 99.47  | 0.3 | 76.6 | 23.1 |
| 5  | LVR19  | 61.17            | 23.58                          | 0.15 | 5.14  | 9.13              | 0.05             | 99.22  | 0.3 | 76.0 | 23.7 |
| 6  | LVR19  | 62.26            | 23.19                          | 0.05 | 4.63  | 10.07             | 0.08             | 100.28 | 0.4 | 79.4 | 20.2 |
| 7  | LVR19  | 62.51            | 22.87                          | 0.02 | 4.38  | 10.09             | 0.07             | 99.93  | 0.4 | 80.3 | 19.3 |
| 8  | LVR19A | 62.49            | 22.79                          | 0.02 | 4.56  | 9.37              | 0.06             | 99.29  | 0.3 | 78.5 | 21.1 |
| 9  | LVR19A | 62.96            | 23.11                          | 0.07 | 4.43  | 8.50              | 0.07             | 99.13  | 0.4 | 77.3 | 22.3 |
| 10 | LVR19A | 62.22            | 23.43                          | 0.06 | 5.04  | 8.61              | 0.07             | 99.42  | 0.4 | 75.3 | 24.3 |
| 11 | LVR19A | 62.29            | 22.95                          | 0.05 | 4.68  | 9.29              | 0.07             | 99.33  | 0.4 | 77.9 | 21.7 |
| 12 | LVR20  | 60.44            | 24.45                          | 0.10 | 5.88  | 8.60              | 0.06             | 99.55  | 0.3 | 72.3 | 27.3 |
| 13 | LVR20  | 64.84            | 22.22                          | 0.14 | 2.81  | 10.30             | 0.05             | 100.38 | 0.3 | 86.7 | 13.1 |
| 14 | LVR20  | 63.56            | 22.74                          | 0.12 | 3.79  | 9.91              | 0.04             | 100.16 | 0.2 | 82.4 | 17.4 |
| 15 | LVR20A | 61.50            | 24.00                          | 0.02 | 5.72  | 8.76              | 0.07             | 100.07 | 0.4 | 73.2 | 26.4 |
| 16 | LVR20A | 61.78            | 24.25                          | 0.03 | 5.68  | 8.47              | 0.07             | 100.28 | 0.4 | 72.7 | 26.9 |
| 17 | LVR20A | 61.96            | 24.07                          | 0.05 | 5.40  | 8.86              | 0.08             | 100.42 | 0.4 | 74.5 | 25.1 |
| 18 | LVR21  | 60.98            | 24.46                          | 0.04 | 6.09  | 8.38              | 0.12             | 100.07 | 0.7 | 70.9 | 28.4 |
| 19 | LVR21  | 61.91            | 23.78                          | 0.04 | 5.49  | 8.55              | 0.12             | 99.88  | 0.7 | 73.3 | 26.0 |
| 20 | LVR21  | 56.56            | 26.73                          | 0.04 | 9.16  | 6.66              | 0.07             | 99.22  | 0.4 | 56.6 | 43.0 |
| 21 | LVR21  | 58.73            | 26.09                          | 0.03 | 7.86  | 7.41              | 0.11             | 100.23 | 0.6 | 62.7 | 36.7 |
| 22 | LVR21A | 55.77            | 27.41                          | 0.02 | 9.52  | 6.52              | 0.09             | 99.34  | 0.5 | 55.0 | 44.5 |
| 23 | LVR21A | 55.76            | 27.46                          | 0.04 | 9.58  | 6.63              | 0.09             | 99.56  | 0.5 | 55.3 | 44.2 |
| 24 | LVR21A | 54.88            | 28.02                          | 0.02 | 10.26 | 5.93              | 0.13             | 99.22  | 0.7 | 50.8 | 48.5 |
| 25 | LVR21A | 56.16            | 27.72                          | 0.03 | 9.79  | 5.90              | 0.13             | 99.71  | 0.7 | 51.8 | 47.5 |

The results of wavelength-dispersion electron-microprobe analyses are quoted in weight %.  
The proportion of Or, Ab and An are quoted in mole %.

SUPPLEMENTARY TABLE S5. COMPOSITIONS OF CALCIC AMPHIBOLE  
FROM THE LYAVARAKA COMPLEX, KOLA PENINSULA

| #  | Sample | SiO <sub>2</sub> | TiO <sub>2</sub> | Al <sub>2</sub> O <sub>3</sub> | Cr <sub>2</sub> O <sub>3</sub> | FeO  | MnO  | MgO   | CaO   | Na <sub>2</sub> O | K <sub>2</sub> O | Total |
|----|--------|------------------|------------------|--------------------------------|--------------------------------|------|------|-------|-------|-------------------|------------------|-------|
| 1  | LVR1   | 54.78            | 0.24             | 4.53                           | 0.51                           | 4.43 | 0.14 | 20.88 | 11.82 | 0.44              | 0.03             | 97.8  |
| 2  | LVR1A  | 53.81            | 0.24             | 5.36                           | 0.68                           | 4.43 | 0.11 | 20.49 | 12.13 | 0.40              | 0.07             | 97.7  |
| 3  | LVR2   | 59.35            | 0.06             | 0.94                           | 0.22                           | 1.92 | 0.05 | 23.09 | 12.27 | 0.10              | 0.02             | 98.0  |
| 4  | LVR2A  | 56.42            | 0.09             | 3.57                           | 0.53                           | 2.60 | 0.05 | 21.43 | 12.68 | 0.55              | 0.12             | 98.0  |
| 5  | LVR3   | 59.11            | 0.05             | 0.75                           | 0.15                           | 1.68 | 0.05 | 23.39 | 12.77 | 0.08              | 0.02             | 98.1  |
| 6  | LVR3A  | 59.22            | 0.05             | 0.28                           | 0.09                           | 1.52 | 0.06 | 23.90 | 13.00 | 0.01              | 0.00             | 98.1  |
| 7  | LVR4   | 54.33            | 0.24             | 5.07                           | 0.63                           | 3.50 | 0.05 | 21.37 | 12.15 | 0.82              | 0.09             | 98.2  |
| 8  | LVR4A  | 53.99            | 0.23             | 4.94                           | 0.82                           | 3.07 | 0.06 | 21.15 | 12.38 | 0.90              | 0.09             | 97.6  |
| 9  | LVR5   | 53.41            | 0.30             | 5.39                           | 0.68                           | 4.08 | 0.11 | 20.54 | 12.06 | 0.60              | 0.08             | 97.2  |
| 10 | LVR6   | 53.91            | 0.19             | 4.66                           | 0.80                           | 3.73 | 0.07 | 21.01 | 12.23 | 0.82              | 0.08             | 97.5  |
| 11 | LVR6A  | 55.25            | 0.16             | 3.87                           | 0.59                           | 3.38 | 0.09 | 21.23 | 12.37 | 0.67              | 0.06             | 97.7  |
| 12 | LVR7   | 53.95            | 0.28             | 5.39                           | 0.79                           | 3.73 | 0.11 | 20.87 | 12.18 | 0.71              | 0.07             | 98.1  |
| 13 | LVR7A  | 52.73            | 0.34             | 6.57                           | 0.98                           | 4.03 | 0.11 | 20.40 | 11.81 | 0.94              | 0.09             | 98.0  |
| 14 | LVR8   | 55.24            | 0.24             | 4.90                           | 0.69                           | 3.93 | 0.10 | 20.81 | 12.09 | 0.46              | 0.05             | 98.5  |
| 15 | LVR8A  | 55.54            | 0.18             | 4.02                           | 0.61                           | 3.52 | 0.08 | 20.83 | 12.42 | 0.27              | 0.04             | 97.5  |
| 16 | LVR9   | 56.47            | 0.18             | 3.12                           | 0.42                           | 3.28 | 0.08 | 22.16 | 12.04 | 0.62              | 0.01             | 98.4  |
| 17 | LVR10  | 56.08            | 0.15             | 3.26                           | 0.54                           | 3.70 | 0.11 | 21.84 | 11.85 | 0.49              | 0.03             | 98.1  |
| 18 | LVR10A | 55.92            | 0.20             | 3.55                           | 0.52                           | 4.80 | 0.13 | 22.13 | 10.37 | 0.55              | 0.03             | 98.2  |
| 19 | LVR11  | 55.57            | 0.19             | 3.92                           | 0.72                           | 3.24 | 0.10 | 21.70 | 12.23 | 0.40              | 0.04             | 98.1  |
| 20 | LVR11A | 56.42            | 0.14             | 3.13                           | 0.56                           | 3.15 | 0.10 | 21.68 | 12.10 | 0.35              | 0.03             | 97.7  |
| 21 | LVR12  | 55.03            | 0.25             | 4.33                           | 0.84                           | 2.61 | 0.09 | 21.11 | 12.38 | 0.73              | 0.11             | 97.5  |
| 22 | LVR12A | 55.72            | 0.19             | 4.01                           | 0.92                           | 2.46 | 0.08 | 21.28 | 12.40 | 0.59              | 0.05             | 97.7  |
| 23 | LVR13  | 57.37            | 0.09             | 2.42                           | 0.46                           | 2.52 | 0.05 | 21.79 | 12.85 | 0.29              | 0.03             | 97.9  |
| 24 | LVR13A | 57.26            | 0.09             | 2.44                           | 0.45                           | 2.53 | 0.05 | 21.66 | 12.84 | 0.35              | 0.02             | 97.7  |
| 25 | LVR15  | 55.49            | 0.18             | 4.15                           | 0.78                           | 2.49 | 0.07 | 22.26 | 12.47 | 0.72              | 0.08             | 98.7  |
| 26 | LVR15A | 55.72            | 0.20             | 3.45                           | 0.63                           | 2.36 | 0.08 | 22.61 | 12.32 | 0.62              | 0.05             | 98.0  |
| 27 | LVR16  | 55.81            | 0.16             | 3.19                           | 0.48                           | 2.61 | 0.06 | 21.77 | 12.74 | 0.37              | 0.02             | 97.2  |
| 28 | LVR16A | 56.82            | 0.12             | 2.48                           | 0.33                           | 2.43 | 0.05 | 22.72 | 12.67 | 0.22              | 0.02             | 97.9  |
| 29 | LVR17  | 57.06            | 0.09             | 2.15                           | 0.44                           | 2.34 | 0.06 | 22.53 | 12.68 | 0.25              | 0.01             | 97.6  |
| 30 | LVR17A | 57.69            | 0.08             | 1.82                           | 0.46                           | 2.39 | 0.07 | 22.53 | 12.56 | 0.23              | 0.01             | 97.8  |
| 31 | LVR18  | 50.68            | 0.40             | 8.08                           | 1.86                           | 4.34 | 0.10 | 18.54 | 11.35 | 1.60              | 0.24             | 97.2  |
| 32 | LVR19  | 50.57            | 0.46             | 9.13                           | 0.82                           | 5.00 | 0.10 | 18.99 | 10.88 | 1.59              | 0.22             | 97.7  |
| 33 | LVR19A | 49.94            | 0.54             | 9.43                           | 0.79                           | 4.53 | 0.10 | 18.36 | 11.69 | 1.64              | 0.24             | 97.3  |
| 34 | LVR20  | 49.49            | 0.40             | 10.00                          | 0.63                           | 5.23 | 0.11 | 18.50 | 10.82 | 1.69              | 0.28             | 97.2  |
| 35 | LVR20A | 49.40            | 0.46             | 10.50                          | 0.56                           | 4.91 | 0.11 | 17.96 | 11.45 | 1.70              | 0.29             | 97.3  |
| 36 | LVR21  | 50.31            | 0.76             | 7.71                           | 1.69                           | 5.10 | 0.10 | 17.90 | 12.18 | 1.04              | 0.43             | 97.2  |
| 37 | LVR21A | 48.15            | 0.91             | 10.74                          | 0.40                           | 6.47 | 0.10 | 16.40 | 12.09 | 1.33              | 0.75             | 97.3  |
| 38 | LVR23B | 52.79            | 0.23             | 5.89                           | 0.73                           | 4.12 | 0.09 | 20.09 | 12.29 | 0.61              | 0.09             | 96.9  |
| 39 | LVR24  | 52.82            | 0.30             | 5.94                           | 0.75                           | 4.04 | 0.11 | 20.12 | 12.31 | 0.45              | 0.07             | 96.9  |
| 40 | LVR24A | 52.52            | 0.30             | 6.23                           | 0.54                           | 4.13 | 0.09 | 19.87 | 12.41 | 0.56              | 0.10             | 96.8  |
| 41 | LVR25  | 55.65            | 0.19             | 3.27                           | 0.51                           | 3.23 | 0.10 | 21.79 | 12.45 | 0.21              | 0.03             | 97.4  |
| 42 | LVR26  | 55.21            | 0.19             | 3.90                           | 0.53                           | 4.03 | 0.10 | 21.11 | 12.22 | 0.41              | 0.08             | 97.8  |
| 43 | LVR26A | 55.05            | 0.19             | 4.03                           | 0.51                           | 4.03 | 0.09 | 21.61 | 11.78 | 0.41              | 0.08             | 97.8  |

|    |        |       |      |      |      |      |      |       |       |      |      |      |
|----|--------|-------|------|------|------|------|------|-------|-------|------|------|------|
| 44 | LVR27  | 56.53 | 0.10 | 2.38 | 0.42 | 2.68 | 0.09 | 22.19 | 12.70 | 0.11 | 0.00 | 97.2 |
| 45 | LVR27A | 56.69 | 0.10 | 2.22 | 0.39 | 3.00 | 0.11 | 21.89 | 12.36 | 0.10 | 0.02 | 96.9 |
| 46 | LVR29  | 55.42 | 0.17 | 3.24 | 0.57 | 2.32 | 0.09 | 22.35 | 12.31 | 0.49 | 0.03 | 97.0 |
| 47 | LVR29A | 56.54 | 0.14 | 2.00 | 0.52 | 2.08 | 0.06 | 23.13 | 12.52 | 0.32 | 0.02 | 97.3 |
| 48 | LVR30  | 59.66 | 0.02 | 0.26 | 0.05 | 1.77 | 0.07 | 23.83 | 12.38 | 0.01 | 0.01 | 98.1 |
| 49 | LVR31A | 55.67 | 0.11 | 3.29 | 0.64 | 2.60 | 0.06 | 21.36 | 12.74 | 0.50 | 0.03 | 97.0 |
| 50 | LVR32  | 54.53 | 0.24 | 4.36 | 1.19 | 2.74 | 0.06 | 21.52 | 11.65 | 0.72 | 0.10 | 97.1 |
| 51 | LVR32A | 54.68 | 0.19 | 3.91 | 0.93 | 2.93 | 0.08 | 21.93 | 11.45 | 0.67 | 0.09 | 96.9 |
| 52 | LVR33  | 55.62 | 0.17 | 3.41 | 0.81 | 2.54 | 0.11 | 21.47 | 12.40 | 0.51 | 0.08 | 97.1 |
| 53 | LVR33A | 55.76 | 0.17 | 3.50 | 0.73 | 2.47 | 0.08 | 21.55 | 12.43 | 0.51 | 0.08 | 97.3 |
| 54 | LVR34  | 54.77 | 0.19 | 3.94 | 0.85 | 2.95 | 0.08 | 21.75 | 12.15 | 0.66 | 0.08 | 97.4 |
| 55 | LVR34A | 55.93 | 0.17 | 3.99 | 0.76 | 2.73 | 0.09 | 21.32 | 12.10 | 0.58 | 0.08 | 97.7 |
| 56 | LVR36  | 55.34 | 0.12 | 3.33 | 0.75 | 2.76 | 0.05 | 21.70 | 12.47 | 0.36 | 0.03 | 96.9 |
| 57 | LVR36A | 56.17 | 0.12 | 3.02 | 0.58 | 2.80 | 0.06 | 21.62 | 12.37 | 0.30 | 0.02 | 97.1 |
| 58 | LVR37  | 52.23 | 0.28 | 6.51 | 0.73 | 4.35 | 0.09 | 19.74 | 12.19 | 0.85 | 0.10 | 97.1 |
| 59 | LVR37A | 53.09 | 0.29 | 6.38 | 0.57 | 4.06 | 0.09 | 19.27 | 12.28 | 0.80 | 0.10 | 96.9 |
| 60 | LVR38  | 54.28 | 0.19 | 4.80 | 0.92 | 2.82 | 0.06 | 21.16 | 12.26 | 0.93 | 0.10 | 97.5 |
| 61 | LVR38A | 53.96 | 0.19 | 4.63 | 1.08 | 2.78 | 0.05 | 20.83 | 12.33 | 0.85 | 0.09 | 96.8 |
| 62 | LVR39  | 54.41 | 0.23 | 5.12 | 1.15 | 2.75 | 0.09 | 20.86 | 12.17 | 0.88 | 0.15 | 97.8 |
| 63 | LVR39A | 54.76 | 0.24 | 4.63 | 1.16 | 3.28 | 0.11 | 21.77 | 10.80 | 0.89 | 0.05 | 97.7 |
| 64 | LVR40  | 54.55 | 0.24 | 4.88 | 1.01 | 2.70 | 0.09 | 21.37 | 12.15 | 0.82 | 0.08 | 97.9 |
| 65 | LVR40A | 54.27 | 0.18 | 4.40 | 1.03 | 3.25 | 0.10 | 21.34 | 11.61 | 0.77 | 0.14 | 97.1 |
| 66 | LVR41  | 56.08 | 0.13 | 3.48 | 0.68 | 2.69 | 0.09 | 21.53 | 12.43 | 0.48 | 0.07 | 97.7 |
| 67 | LVR42  | 53.93 | 0.24 | 5.36 | 1.25 | 4.22 | 0.10 | 21.98 | 9.69  | 1.01 | 0.16 | 97.9 |
| 68 | LVR42A | 54.25 | 0.23 | 5.15 | 1.20 | 2.90 | 0.09 | 20.51 | 11.94 | 0.98 | 0.13 | 97.4 |
| 69 | LVR43  | 54.90 | 0.21 | 4.89 | 1.11 | 3.90 | 0.10 | 21.81 | 10.31 | 0.90 | 0.12 | 98.2 |
| 70 | LVR43A | 54.79 | 0.23 | 4.56 | 1.07 | 4.08 | 0.13 | 21.53 | 9.97  | 0.91 | 0.12 | 97.4 |
| 71 | LVR44  | 53.39 | 0.26 | 5.49 | 1.24 | 2.98 | 0.10 | 20.81 | 12.02 | 1.11 | 0.13 | 97.5 |
| 72 | LVR44A | 53.50 | 0.25 | 5.34 | 1.23 | 2.82 | 0.08 | 20.35 | 12.10 | 1.06 | 0.11 | 96.8 |
| 73 | LVR45  | 53.44 | 0.26 | 5.55 | 1.35 | 2.91 | 0.07 | 20.38 | 11.85 | 1.11 | 0.10 | 97.0 |
| 74 | LVR45A | 53.69 | 0.24 | 5.35 | 1.27 | 3.01 | 0.07 | 20.77 | 11.86 | 1.03 | 0.09 | 97.4 |

---

The results of wavelength-dispersion electron-microprobe analyses are quoted in weight %.

SUPPLEMENTARY TABLE S6. COMPOSITIONS OF Mg-Fe AMPHIBOLE  
FROM THE LYAVARAKA COMPLEX, KOLA PENINSULA

| #  | Sample | SiO <sub>2</sub> | TiO <sub>2</sub> | Al <sub>2</sub> O <sub>3</sub> | Cr <sub>2</sub> O <sub>3</sub> | FeO   | MnO  | MgO   | CaO  | Na <sub>2</sub> O | K <sub>2</sub> O | Total |
|----|--------|------------------|------------------|--------------------------------|--------------------------------|-------|------|-------|------|-------------------|------------------|-------|
| 1  | LVR1   | 59.09            | 0.03             | 1.13                           | 0.12                           | 9.66  | 0.33 | 27.83 | 0.41 | 0.06              | 0                | 98.66 |
| 2  | LVR1A  | 58.70            | 0.03             | 1.31                           | 0.13                           | 9.73  | 0.33 | 27.75 | 0.48 | 0.04              | 0                | 98.50 |
| 3  | LVR2A  | 60.84            | 0                | 0.14                           | 0.05                           | 6.79  | 0.21 | 29.70 | 0.50 | 0.00              | 0.01             | 98.24 |
| 4  | LVR4   | 59.35            | 0.02             | 0.14                           | 0.23                           | 7.61  | 0.19 | 30.25 | 0.68 | 0.01              | 0.01             | 98.48 |
| 5  | LVR4A  | 59.33            | 0.01             | 0.05                           | 0.06                           | 8.65  | 0.20 | 29.63 | 0.46 | 0.02              | 0                | 98.39 |
| 6  | LVR5   | 58.12            | 0.05             | 1.30                           | 0.17                           | 8.68  | 0.24 | 28.69 | 0.46 | 0.11              | 0.01             | 97.82 |
| 7  | LVR5A  | 58.41            | 0.04             | 1.56                           | 0.18                           | 8.45  | 0.24 | 28.43 | 0.53 | 0.10              | 0                | 97.94 |
| 8  | LVR6   | 59.40            | 0.01             | 0.07                           | 0.05                           | 10.32 | 0.30 | 27.76 | 0.34 | 0.01              | 0.01             | 98.26 |
| 9  | LVR6A  | 58.80            | 0.04             | 1.23                           | 0.20                           | 8.10  | 0.23 | 28.82 | 0.62 | 0.15              | 0                | 98.18 |
| 10 | LVR7   | 58.75            | 0.04             | 1.58                           | 0.30                           | 8.10  | 0.23 | 28.90 | 0.50 | 0.15              | 0.01             | 98.55 |
| 11 | LVR7A  | 58.07            | 0.06             | 2.04                           | 0.38                           | 8.07  | 0.24 | 28.75 | 0.58 | 0.26              | 0                | 98.44 |
| 12 | LVR8   | 59.31            | 0.06             | 1.62                           | 0.22                           | 8.15  | 0.23 | 28.51 | 0.68 | 0.08              | 0                | 98.83 |
| 13 | LVR8A  | 59.46            | 0.05             | 1.33                           | 0.14                           | 8.10  | 0.23 | 28.53 | 0.54 | 0.09              | 0                | 98.46 |
| 14 | LVR9   | 61.24            | 0.01             | 0.08                           | 0.04                           | 6.91  | 0.16 | 29.17 | 0.22 | 0.06              | 0                | 97.89 |
| 15 | LVR9A  | 58.83            | 0                | 0.05                           | 0.03                           | 9.27  | 0.22 | 29.95 | 0.26 | 0.07              | 0                | 98.69 |
| 16 | LVR10  | 59.03            | 0.04             | 1.01                           | 0.17                           | 8.10  | 0.23 | 28.95 | 0.54 | 0.11              | 0                | 98.17 |
| 17 | LVR10A | 59.23            | 0.04             | 0.80                           | 0.11                           | 8.30  | 0.23 | 28.95 | 0.44 | 0.11              | 0                | 98.21 |
| 18 | LVR11  | 59.09            | 0.03             | 1.01                           | 0.15                           | 7.97  | 0.23 | 29.38 | 0.36 | 0.06              | 0                | 98.28 |
| 19 | LVR11A | 58.92            | 0.05             | 1.51                           | 0.24                           | 7.91  | 0.21 | 28.76 | 0.61 | 0.11              | 0.01             | 98.31 |
| 20 | LVR14  | 59.23            | 0.03             | 0.99                           | 0.12                           | 8.41  | 0.25 | 28.59 | 0.51 | 0.11              | 0                | 98.24 |
| 21 | LVR14A | 59.29            | 0.02             | 0.50                           | 0.12                           | 8.39  | 0.22 | 29.83 | 0.36 | 0.03              | 0                | 98.77 |
| 22 | LVR19  | 58.11            | 0.05             | 1.78                           | 0.35                           | 9.57  | 0.23 | 27.45 | 0.54 | 0.21              | 0.01             | 98.29 |
| 23 | LVR19A | 58.15            | 0.05             | 1.48                           | 0.28                           | 9.87  | 0.24 | 27.43 | 0.52 | 0.14              | 0                | 98.17 |
| 24 | LVR20A | 58.58            | 0.02             | 1.16                           | 0.25                           | 9.87  | 0.28 | 27.51 | 0.38 | 0.13              | 0                | 98.18 |
| 25 | LVR23B | 58.33            | 0.03             | 1.83                           | 0.22                           | 8.59  | 0.23 | 28.23 | 0.52 | 0.13              | 0                | 98.11 |
| 26 | LVR24  | 57.95            | 0.05             | 2.24                           | 0.29                           | 8.52  | 0.25 | 27.45 | 0.54 | 0.12              | 0                | 97.41 |
| 27 | LVR24A | 58.82            | 0.03             | 0.61                           | 0.09                           | 8.33  | 0.24 | 28.60 | 0.37 | 0.05              | 0                | 97.12 |
| 28 | LVR25  | 58.73            | 0.05             | 0.92                           | 0.14                           | 7.73  | 0.26 | 29.23 | 0.50 | 0.06              | 0.00             | 97.61 |
| 29 | LVR25A | 58.93            | 0.02             | 0.82                           | 0.15                           | 7.74  | 0.26 | 29.08 | 0.45 | 0.03              | 0.01             | 97.49 |
| 30 | LVR26  | 57.75            | 0.03             | 1.20                           | 0.16                           | 9.71  | 0.25 | 27.87 | 0.53 | 0.09              | 0                | 97.58 |
| 31 | LVR27  | 59.71            | 0                | 0.51                           | 0.10                           | 6.94  | 0.27 | 29.89 | 0.42 | 0.02              | 0.01             | 97.86 |
| 32 | LVR27A | 59.96            | 0.02             | 0.49                           | 0.05                           | 6.92  | 0.26 | 29.87 | 0.39 | 0.02              | 0                | 97.97 |
| 33 | LVR29  | 59.79            | 0.01             | 0.13                           | 0.05                           | 7.68  | 0.25 | 29.22 | 0.54 | 0.02              | 0                | 97.69 |
| 34 | LVR29A | 59.20            | 0                | 0.11                           | 0.06                           | 7.58  | 0.23 | 30.72 | 0.42 | 0.00              | 0                | 98.33 |
| 35 | LVR30  | 59.87            | 0.01             | 0.06                           | 0.03                           | 7.26  | 0.17 | 30.74 | 0.28 | 0.03              | 0                | 98.45 |
| 36 | LVR30A | 59.69            | 0                | 0.09                           | 0.07                           | 6.66  | 0.15 | 30.05 | 0.10 | 0.01              | 0.01             | 96.82 |
| 37 | LVR32A | 58.85            | 0.02             | 0.52                           | 0.15                           | 7.29  | 0.22 | 29.65 | 0.35 | 0.02              | 0                | 97.06 |
| 38 | LVR37  | 58.11            | 0.08             | 1.83                           | 0.22                           | 8.73  | 0.27 | 27.75 | 0.62 | 0.17              | 0                | 97.77 |
| 39 | LVR37A | 58.40            | 0.05             | 2.32                           | 0.28                           | 8.46  | 0.24 | 27.47 | 0.54 | 0.22              | 0                | 97.98 |
| 40 | LVR40  | 59.58            | 0.01             | 0.62                           | 0.16                           | 7.56  | 0.22 | 29.91 | 0.37 | 0.07              | 0                | 98.51 |
| 41 | LVR40A | 59.80            | 0.01             | 0.25                           | 0.03                           | 8.12  | 0.25 | 29.47 | 0.44 | 0.05              | 0.01             | 98.43 |
| 42 | LVR41  | 59.70            | 0.02             | 0.34                           | 0.08                           | 7.94  | 0.24 | 29.25 | 0.39 | 0.07              | 0                | 98.02 |

The results of wavelength-dispersion electron-microprobe analyses are quoted in weight %.  
A zero implies below the detection limits.



SUPPLEMENTARY TABLE S7. COMPOSITIONS OF PARGASITE,  
LYAVARAKA COMPLEX, KOLA PENINSULA

| # | Sample | SiO <sub>2</sub> | TiO <sub>2</sub> | Al <sub>2</sub> O <sub>3</sub> | Cr <sub>2</sub> O <sub>3</sub> | FeO  | MnO  | MgO   | CaO   | Na <sub>2</sub> O | K <sub>2</sub> O | Total |
|---|--------|------------------|------------------|--------------------------------|--------------------------------|------|------|-------|-------|-------------------|------------------|-------|
| 1 | LVR28  | 42.53            | 0.71             | 14.92                          | 0.25                           | 7.38 | 0.09 | 15.23 | 11.81 | 2.99              | 0.83             | 96.7  |
| 2 | LVR28  | 42.47            | 0.72             | 14.85                          | 0.25                           | 7.34 | 0.09 | 15.11 | 11.76 | 2.94              | 0.85             | 96.4  |
| 3 | LVR28  | 42.52            | 0.49             | 15.39                          | 0.13                           | 7.28 | 0.10 | 15.11 | 11.73 | 3.12              | 0.60             | 96.5  |
| 4 | LVR28  | 42.55            | 0.44             | 15.34                          | 0.11                           | 7.16 | 0.10 | 15.31 | 11.76 | 3.09              | 0.61             | 96.5  |
| 5 | LVR28A | 42.25            | 0.57             | 15.33                          | 0.05                           | 7.19 | 0.09 | 15.71 | 11.80 | 3.11              | 0.69             | 96.8  |
| 6 | LVR28A | 42.42            | 0.55             | 15.51                          | 0.05                           | 7.22 | 0.09 | 15.54 | 11.60 | 3.07              | 0.69             | 96.7  |
| 7 | LVR28A | 42.36            | 0.42             | 15.63                          | 0.01                           | 7.38 | 0.10 | 15.42 | 11.57 | 2.94              | 0.86             | 96.7  |
| 8 | LVR28A | 42.05            | 0.39             | 15.50                          | 0.06                           | 7.13 | 0.08 | 15.65 | 11.73 | 3.01              | 0.81             | 96.4  |

The results of wavelength-dispersion electron-microprobe analyses are quoted in weight %.

SUPPLEMENTARY TABLE S8. COMPOSITIONS OF SCAPOLITE,  
LYAVARAKA COMPLEX, KOLA PENINSULA

| #  | SiO <sub>2</sub> | Al <sub>2</sub> O <sub>3</sub> | FeO  | MnO  | CaO  | SrO  | BaO  | Na <sub>2</sub> O | K <sub>2</sub> O | SO <sub>3</sub> | Cl   | F    | Total* |
|----|------------------|--------------------------------|------|------|------|------|------|-------------------|------------------|-----------------|------|------|--------|
| 1  | 51.46            | 24.07                          | 0.01 | 0.01 | 7.91 | 0    | 0.10 | 9.25              | 0.22             | 0.04            | 0.92 | 0.09 | 93.83  |
| 2  | 51.45            | 24.23                          | 0.09 | 0.02 | 7.85 | 0    | 0.05 | 9.43              | 0.19             | 0.02            | 0.86 | 0    | 93.99  |
| 3  | 51.43            | 24.14                          | 0.06 | 0.02 | 7.99 | 0    | 0.05 | 9.51              | 0.21             | 0.01            | 0.82 | 0.01 | 94.05  |
| 4  | 51.57            | 24.31                          | 0.04 | 0    | 8.07 | 0.04 | 0.12 | 9.44              | 0.21             | 0.04            | 0.84 | 0.11 | 94.54  |
| 5  | 52.68            | 24.77                          | 0.05 | 0.02 | 8.73 | 0.04 | 0.00 | 8.13              | 0.20             | 0.05            | 1.06 | 0.01 | 95.50  |
| 6  | 51.86            | 24.22                          | 0.06 | 0    | 8.66 | 0.11 | 0.11 | 9.16              | 0.23             | 0.03            | 1.21 | 0    | 95.36  |
| 7  | 51.86            | 24.23                          | 0.05 | 0    | 8.20 | 0.07 | 0.01 | 9.33              | 0.24             | 0.05            | 1.06 | 0.06 | 94.89  |
| 8  | 51.67            | 24.95                          | 0.05 | 0.02 | 9.00 | 0.06 | 0.01 | 8.76              | 0.22             | 0.05            | 0.96 | 0    | 95.53  |
| 9  | 52.02            | 24.46                          | 0.05 | 0    | 8.91 | 0.04 | 0.07 | 8.92              | 0.24             | 0.06            | 1.20 | 0    | 95.69  |
| 10 | 51.89            | 24.44                          | 0.07 | 0    | 8.38 | 0    | 0.07 | 9.50              | 0.21             | 0.05            | 1.00 | 0    | 95.37  |
| 11 | 52.00            | 24.42                          | 0.08 | 0    | 8.31 | 0.04 | 0    | 8.44              | 0.24             | 0.02            | 0.98 | 0    | 94.30  |
| 12 | 51.86            | 24.33                          | 0.13 | 0    | 7.93 | 0.07 | 0.03 | 9.33              | 0.23             | 0.05            | 0.94 | 0    | 94.68  |
| 13 | 50.89            | 24.73                          | 0.06 | 0.04 | 9.10 | 0.17 | 0.06 | 8.68              | 0.22             | 0.03            | 0.96 | 0    | 94.72  |
| 14 | 51.42            | 24.29                          | 0.06 | 0    | 8.10 | 0.04 | 0.05 | 9.48              | 0.21             | 0.04            | 0.82 | 0.06 | 94.35  |
| 15 | 51.36            | 24.23                          | 0.09 | 0.01 | 8.14 | 0.11 | 0    | 9.27              | 0.19             | 0.06            | 0.84 | 0    | 94.10  |
| 16 | 51.36            | 24.36                          | 0.05 | 0.02 | 8.21 | 0    | 0.06 | 9.44              | 0.24             | 0.05            | 0.81 | 0.05 | 94.44  |
| 17 | 51.29            | 24.34                          | 0.07 | 0.02 | 8.25 | 0.14 | 0.01 | 9.32              | 0.18             | 0.02            | 0.83 | 0    | 94.27  |
| 18 | 51.47            | 24.53                          | 0.06 | 0.01 | 8.33 | 0.08 | 0.06 | 9.30              | 0.17             | 0.04            | 0.83 | 0    | 94.68  |
| 19 | 50.80            | 24.54                          | 0.03 | 0.01 | 9.18 | 0.08 | 0.05 | 8.57              | 0.22             | 0.05            | 1.09 | 0    | 94.36  |
| 20 | 51.17            | 24.42                          | 0.02 | 0.03 | 8.82 | 0.11 | 0.05 | 9.02              | 0.21             | 0.01            | 0.95 | 0    | 94.60  |
| 21 | 50.37            | 24.67                          | 0.06 | 0.03 | 9.61 | 0    | 0.03 | 8.36              | 0.23             | 0.04            | 0.98 | 0    | 94.15  |
| 22 | 51.12            | 24.68                          | 0.06 | 0    | 8.82 | 0.09 | 0.05 | 9.20              | 0.22             | 0.04            | 0.95 | 0    | 95.01  |
| 23 | 51.14            | 24.54                          | 0.03 | 0    | 9.02 | 0.09 | 0.04 | 8.97              | 0.21             | 0.06            | 0.97 | 0    | 94.85  |
| 24 | 51.18            | 24.66                          | 0.05 | 0.03 | 9.74 | 0.08 | 0.08 | 8.33              | 0.25             | 0.05            | 1.27 | 0.02 | 95.44  |
| 25 | 51.32            | 24.39                          | 0.07 | 0    | 8.00 | 0.05 | 0.03 | 9.49              | 0.23             | 0.03            | 0.81 | 0.07 | 94.26  |

Grains of scapolite analyzed occur in association with Pl and Phl in sample LVR-20A. The results of wavelength-dispersion electron-microprobe analyses are quoted in weight %. Mg, Cr, and Ti were sought, but not detected. Zero means "not detected". \* Total was corrected for O ≡(Cl, F).

SUPPLEMENTARY TABLE S9. COMPOSITIONS OF PHLOGOPITE, LYAVARAKA COMPLEX, KOLA PENINSULA

| #  | Sample | SiO <sub>2</sub> | TiO <sub>2</sub> | Al <sub>2</sub> O <sub>3</sub> | Cr <sub>2</sub> O <sub>3</sub> | FeO  | MnO  | MgO   | CaO  | SrO  | BaO  | Na <sub>2</sub> O | K <sub>2</sub> O | Cl   | F    | Total |
|----|--------|------------------|------------------|--------------------------------|--------------------------------|------|------|-------|------|------|------|-------------------|------------------|------|------|-------|
| 1  | LVR18  | 39.51            | 1.72             | 15.67                          | 0.96                           | 4.93 | 0.03 | 22.60 | 0    | n.a. | n.a. | 0.75              | 8.32             | n.a. | n.a. | 93.7  |
| 2  | LVR18  | 38.88            | 1.78             | 15.24                          | 1.01                           | 5.14 | 0.01 | 22.36 | 0.02 | n.a. | n.a. | 0.67              | 8.21             | n.a. | n.a. | 92.7  |
| 3  | LVR19A | 38.75            | 2.02             | 14.67                          | 1.26                           | 5.62 | 0    | 22.28 | 0.09 | n.a. | n.a. | 0.43              | 8.20             | n.a. | n.a. | 92.9  |
| 4  | LVR19A | 38.67            | 2.12             | 14.72                          | 1.26                           | 5.34 | 0.02 | 21.94 | 0.04 | n.a. | n.a. | 0.42              | 8.61             | n.a. | n.a. | 92.7  |
| 5  | LVR19A | 39.23            | 2.08             | 15.01                          | 1.21                           | 5.26 | 0.03 | 21.79 | 0    | n.a. | n.a. | 0.53              | 8.67             | n.a. | n.a. | 93.3  |
| 6  | LVR19A | 39.38            | 2.07             | 14.61                          | 1.19                           | 5.32 | 0    | 21.38 | 0    | n.a. | n.a. | 0.56              | 8.52             | n.a. | n.a. | 92.5  |
| 7  | LVR20  | 39.99            | 1.60             | 15.73                          | 0.88                           | 4.80 | 0.02 | 21.79 | 0    | n.a. | n.a. | 0.30              | 8.75             | n.a. | n.a. | 93.5  |
| 8  | LVR20  | 39.71            | 1.54             | 15.24                          | 0.85                           | 4.79 | 0.02 | 22.39 | 0    | n.a. | n.a. | 0.28              | 8.81             | n.a. | n.a. | 93.4  |
| 9  | LVR20  | 40.43            | 1.58             | 15.66                          | 0.89                           | 5.24 | 0.01 | 21.73 | 0    | n.a. | n.a. | 0.12              | 8.18             | n.a. | n.a. | 93.7  |
| 10 | LVR20A | 39.80            | 1.85             | 16.13                          | 1.00                           | 4.85 | 0.02 | 23.04 | 0    | 0    | 0.30 | 0.36              | 8.65             | 0.17 | 0.03 | 95.8  |
| 11 | LVR20A | 40.25            | 1.76             | 16.25                          | 0.87                           | 4.61 | 0.01 | 23.55 | 0    | 0.06 | 0.28 | 0.33              | 8.58             | 0.12 | 0    | 96.3  |
| 12 | LVR20A | 40.59            | 1.70             | 16.28                          | 0.85                           | 4.56 | 0.03 | 23.34 | 0.01 | 0    | 0.34 | 0.39              | 8.62             | 0.13 | 0.06 | 96.5  |
| 13 | LVR20A | 40.19            | 1.54             | 16.43                          | 0.66                           | 4.35 | 0.01 | 23.02 | 0    | 0    | 0.37 | 0.28              | 9.00             | 0.16 | 0    | 95.7  |
| 14 | LVR20A | 40.01            | 1.63             | 16.35                          | 0.80                           | 4.50 | 0    | 22.96 | 0    | 0.02 | 0.42 | 0.33              | 9.03             | 0.17 | 0    | 95.9  |
| 15 | LVR20A | 40.08            | 1.65             | 16.26                          | 0.84                           | 4.43 | 0.02 | 22.90 | 0.03 | 0    | 0.41 | 0.34              | 8.79             | 0.17 | 0    | 95.6  |
| 16 | LVR20A | 40.20            | 1.61             | 16.33                          | 0.82                           | 4.43 | 0    | 22.80 | 0.06 | 0    | 0.30 | 0.39              | 8.89             | 0.18 | 0.05 | 95.7  |
| 17 | LVR20A | 40.10            | 1.61             | 16.47                          | 0.73                           | 4.53 | 0    | 22.99 | 0.00 | 0    | 0.31 | 0.36              | 8.81             | 0.18 | 0.12 | 95.9  |
| 18 | LVR21  | 38.88            | 3.46             | 14.92                          | 0.50                           | 7.90 | 0    | 18.88 | 0    | n.a. | n.a. | 0.24              | 8.88             | n.a. | n.a. | 93.4  |
| 19 | LVR21  | 39.10            | 3.49             | 15.10                          | 0.52                           | 7.74 | 0.03 | 18.84 | 0    | n.a. | n.a. | 0.22              | 8.73             | n.a. | n.a. | 93.5  |
| 20 | LVR21  | 39.26            | 4.12             | 14.88                          | 0.43                           | 7.74 | 0.03 | 18.63 | 0    | n.a. | n.a. | 0.21              | 9.06             | n.a. | n.a. | 94.2  |
| 21 | LVR21  | 38.86            | 4.10             | 14.84                          | 0.44                           | 7.64 | 0.04 | 18.60 | 0    | n.a. | n.a. | 0.22              | 9.03             | n.a. | n.a. | 93.6  |
| 22 | LVR43  | 41.05            | 1.25             | 14.98                          | 1.35                           | 3.03 | 0.01 | 23.28 | 0.03 | n.a. | n.a. | 1.18              | 7.75             | n.a. | n.a. | 92.7  |
| 23 | LVR43  | 41.49            | 1.16             | 14.97                          | 1.32                           | 3.12 | 0.01 | 22.87 | 0.01 | n.a. | n.a. | 1.14              | 7.67             | n.a. | n.a. | 92.6  |
| 24 | LVR43  | 41.00            | 1.26             | 15.02                          | 1.35                           | 2.90 | 0    | 23.10 | 0.01 | n.a. | n.a. | 1.12              | 7.95             | n.a. | n.a. | 92.6  |
| 25 | LVR43  | 40.66            | 1.24             | 14.84                          | 1.37                           | 2.89 | 0.01 | 23.27 | 0.05 | n.a. | n.a. | 1.27              | 7.87             | n.a. | n.a. | 92.2  |

The results of wavelength-dispersion electron-microprobe analyses are quoted in weight %. Zero stands for "not detected"; n.a. means "not analyzed".

SUPPLEMENTARY TABLE S10. COMPOSITIONS OF SULFIDE MINERALS,  
LYAVARAKA COMPLEX, KOLA PENINSULA

| #  | Sample | Symbol | Fe    | Co   | Ni    | Cu    | S     | Total  | Fe   | Co    | Ni    | Cu    | ΣM   | S    |
|----|--------|--------|-------|------|-------|-------|-------|--------|------|-------|-------|-------|------|------|
| 1  | LVR18  | UC-1   | 10.39 | 0    | 0.05  | 46.53 | 42.94 | 99.90  | 0.25 | 0     | <0.01 | 0.97  | 1.22 | 1.78 |
| 2  | LVR18  | UC-2   | 24.58 | 0    | 0.05  | 24.63 | 50.67 | 99.93  | 0.55 | 0     | <0.01 | 0.48  | 1.03 | 1.97 |
| 3  | LVR18  | UC-3   | 24.52 | 0    | 0.02  | 24.83 | 50.56 | 99.93  | 0.55 | 0     | <0.01 | 0.49  | 1.04 | 1.97 |
| 4  | LVR19  | Pn-1   | 29.04 | 1.25 | 35.26 | 0.07  | 33.57 | 99.19  | 4.04 | 0.16  | 4.66  | 0.01  | 8.87 | 8.13 |
| 5  | LVR19  | Ccp    | 30.34 | 0    | 0.28  | 34.33 | 35.60 | 100.55 | 0.99 | 0     | 0.01  | 0.98  | -    | 2.02 |
| 6  | LVR19  | Pn-2   | 28.86 | 1.22 | 34.87 | 0.18  | 33.24 | 98.37  | 4.05 | 0.16  | 4.65  | 0.02  | 8.88 | 8.12 |
| 7  | LVR19  | Pn-3   | 28.60 | 1.19 | 35.21 | 0.55  | 33.61 | 99.16  | 3.98 | 0.16  | 4.66  | 0.07  | 8.86 | 8.14 |
| 8  | LVR23  | Pn-1   | 32.64 | 1.28 | 32.80 | 0.02  | 32.79 | 99.53  | 4.54 | 0.17  | 4.34  | 0     | 9.05 | 7.95 |
| 9  | LVR23  | Pn-2   | 32.56 | 1.34 | 32.93 | 0     | 32.78 | 99.61  | 4.53 | 0.18  | 4.36  | 0     | 9.06 | 7.94 |
| 10 | LVR23  | Tro-1  | 63.34 | 0    | 0.03  | 0     | 36.34 | 99.71  | 1.00 | 0     | <0.01 | 0     | -    | 1.00 |
| 11 | LVR23  | Tro-2  | 61.21 | 0    | 0.03  | 0.01  | 38.39 | 99.64  | 0.96 | 0     | <0.01 | <0.01 | -    | 1.04 |
| 12 | LVR23A | Ccp-1  | 30.44 | 0    | 0.06  | 34.48 | 34.77 | 99.75  | 1.00 | 0     | <0.01 | 1.00  | -    | 2.00 |
| 13 | LVR23A | Ccp-2  | 30.25 | 0    | 0.04  | 34.33 | 34.94 | 99.56  | 1.00 | 0     | <0.01 | 0.99  | -    | 2.01 |
| 14 | LVR23A | Tro-1  | 63.47 | 0.01 | 0     | 0.01  | 36.14 | 99.63  | 1.00 | <0.01 | 0     | <0.01 | -    | 1.00 |
| 15 | LVR23A | Tro-2  | 63.37 | 0    | 0     | 0     | 36.35 | 99.72  | 1.00 | 0     | 0     | 0     | -    | 1.00 |

The results of wavelength-dispersion electron-microprobe analyses are first quoted in weight %, then recalculated in terms of atoms per formula unit (*apfu*). Label UC-1 pertains to uncommon (Cu,Fe)S<sub>2-x</sub>; UC-2, 3 to (Fe,Cu)S<sub>2</sub>; Ccp is chalcopyrite, Pn is pentlandite, and Tro is troilite. Values of atoms per formula unit were calculated based on a total of 3 *apfu* for sulfides UC-1 to UC-3 (#1 – 3), 17 *apfu* for Pn, 4 *apfu* for Ccp, and 2 *apfu* for Tro.

SUPPLEMENTARY TABLE S11. BULK COMPOSITION OF MEMBERS OF THE LYAVARAKA ULTRABASIC COMPLEX: MAJOR ELEMENTS

| #  | Sample | SiO <sub>2</sub> | TiO <sub>2</sub> | Al <sub>2</sub> O <sub>3</sub> | Fe <sub>2</sub> O <sub>3</sub> | Cr <sub>2</sub> O <sub>3</sub> | FeO   | MnO  | MgO   | CaO  | Na <sub>2</sub> O | K <sub>2</sub> O | P <sub>2</sub> O <sub>5</sub> | V <sub>2</sub> O <sub>5</sub> | BaO   | NiO  | SO <sub>3</sub> | LOI   | Total  | Mg/Si | Mg*  |
|----|--------|------------------|------------------|--------------------------------|--------------------------------|--------------------------------|-------|------|-------|------|-------------------|------------------|-------------------------------|-------------------------------|-------|------|-----------------|-------|--------|-------|------|
| 1  | LVR-1  | 53.49            | 0.18             | 3.26                           | 10.43                          | 0.64                           | 9.38  | 0.26 | 26.72 | 3.88 | 0.13              | 0.03             | 0.02                          | 0.02                          | 0.01  | 0.06 | <0.03           | 0.80  | 99.94  | 0.74  | 83.5 |
| 2  | LVR-2  | 54.33            | 0.06             | 1.02                           | 7.73                           | 0.79                           | 6.96  | 0.13 | 33.60 | 1.07 | <0.05             | 0.01             | 0.01                          | 0.01                          | 0.01  | 0.09 | <0.03           | 0.66  | 99.53  | 0.92  | 89.6 |
| 3  | LVR-5  | 53.04            | 0.12             | 3.33                           | 9.63                           | 0.86                           | 8.66  | 0.18 | 27.99 | 3.18 | 0.14              | 0.03             | 0.01                          | 0.01                          | 0.01  | 0.08 | <0.03           | 0.71  | 99.37  | 0.79  | 85.2 |
| 4  | LVR-7  | 53.94            | 0.12             | 2.41                           | 9.35                           | 0.71                           | 8.41  | 0.18 | 30.34 | 1.96 | 0.06              | 0.02             | 0.01                          | 0.01                          | <0.01 | 0.07 | <0.03           | 0.30  | 99.51  | 0.84  | 86.5 |
| 5  | LVR-8  | 54.24            | 0.12             | 2.36                           | 9.53                           | 0.68                           | 8.57  | 0.17 | 29.78 | 2.32 | <0.05             | 0.02             | 0.01                          | 0.01                          | <0.01 | 0.06 | <0.03           | 0.26  | 99.64  | 0.82  | 86.1 |
| 6  | LVR-11 | 54.62            | 0.11             | 2.27                           | 8.91                           | 0.73                           | 8.02  | 0.17 | 30.53 | 2.09 | <0.05             | 0.02             | 0.01                          | 0.01                          | 0.01  | 0.07 | <0.03           | 0.27  | 99.87  | 0.83  | 87.2 |
| 7  | LVR-13 | 54.39            | 0.07             | 1.22                           | 8.60                           | 0.88                           | 7.74  | 0.17 | 32.98 | 0.88 | <0.05             | 0.01             | 0.01                          | 0.01                          | 0.01  | 0.08 | <0.03           | 0.29  | 99.63  | 0.90  | 88.4 |
| 8  | LVR-14 | 53.55            | 0.11             | 1.89                           | 10.05                          | 0.54                           | 9.04  | 0.19 | 30.36 | 1.52 | 0.06              | 0.02             | 0.03                          | 0.01                          | 0.01  | 0.05 | <0.03           | 0.80  | 99.26  | 0.85  | 85.7 |
| 9  | LVR-15 | 54.10            | 0.08             | 1.41                           | 8.13                           | 0.97                           | 7.32  | 0.16 | 32.69 | 1.28 | <0.05             | 0.01             | 0.01                          | 0.01                          | <0.01 | 0.08 | 0.08            | 0.63  | 99.64  | 0.90  | 88.8 |
| 10 | LVR-16 | 53.78            | 0.10             | 1.35                           | 8.27                           | 0.83                           | 7.44  | 0.16 | 33.39 | 1.23 | <0.05             | 0.01             | 0.01                          | 0.01                          | <0.01 | 0.08 | 0.08            | 0.62  | 99.87  | 0.93  | 88.9 |
| 11 | LVR-17 | 54.49            | 0.07             | 1.38                           | 8.19                           | 1.01                           | 7.37  | 0.16 | 32.91 | 1.02 | <0.05             | 0.01             | 0.01                          | 0.01                          | 0.01  | 0.07 | <0.03           | 0.04  | 99.39  | 0.90  | 88.8 |
| 12 | LVR-18 | 53.31            | 0.19             | 4.37                           | 9.17                           | 0.70                           | 8.25  | 0.16 | 26.69 | 3.18 | 0.62              | 0.20             | 0.03                          | 0.01                          | 0.01  | 0.09 | <0.03           | 0.36  | 99.14  | 0.75  | 85.2 |
| 13 | LVR-19 | 53.95            | 0.23             | 5.27                           | 9.26                           | 0.61                           | 8.34  | 0.16 | 25.18 | 3.75 | 0.86              | 0.27             | 0.03                          | 0.01                          | 0.01  | 0.08 | <0.03           | 0.30  | 100.03 | 0.70  | 84.3 |
| 14 | LVR-20 | 48.71            | 0.19             | 5.12                           | 8.44                           | 0.65                           | 7.59  | 0.14 | 23.29 | 3.60 | 0.92              | 0.26             | 0.05                          | 0.01                          | 0.01  | 0.33 | 0.11            | 0.85  | 92.69  | 0.71  | 84.5 |
| 15 | LVR-21 | 52.88            | 0.30             | 7.65                           | 9.83                           | 0.45                           | 8.85  | 0.17 | 20.64 | 5.85 | 1.14              | 0.40             | 0.04                          | 0.02                          | 0.02  | 0.07 | <0.03           | 0.51  | 100.03 | 0.58  | 80.6 |
| 16 | LVR-22 | 51.08            | 0.18             | 4.10                           | 9.40                           | 0.58                           | 8.46  | 0.18 | 28.26 | 2.94 | 0.15              | 0.03             | 0.01                          | 0.02                          | 0.01  | 0.08 | <0.03           | 2.59  | 99.65  | 0.82  | 85.6 |
| 17 | LVR-23 | 44.20            | 0.12             | 3.78                           | 11.72                          | 2.28                           | 10.55 | 0.17 | 31.38 | 1.01 | <0.05             | 0.01             | 0.03                          | 0.02                          | 0.01  | 0.16 | 0.07            | 5.25  | 100.20 | 1.06  | 84.1 |
| 18 | LVR-25 | 54.39            | 0.11             | 1.93                           | 9.41                           | 0.73                           | 8.47  | 0.21 | 30.87 | 1.05 | <0.05             | 0.01             | 0.01                          | 0.01                          | 0.01  | 0.06 | <0.03           | 0.72  | 99.55  | 0.85  | 86.7 |
| 19 | LVR-28 | 47.65            | 0.33             | 5.88                           | 12.77                          | 0.39                           | 11.49 | 0.20 | 22.14 | 8.70 | 0.79              | 0.28             | 0.04                          | 0.02                          | 0.02  | 0.09 | 0.10            | 0.71  | 100.11 | 0.69  | 77.5 |
| 20 | LVR-29 | 54.10            | 0.07             | 1.45                           | 8.14                           | 0.84                           | 7.33  | 0.16 | 32.74 | 1.14 | <0.05             | 0.01             | 0.01                          | 0.01                          | 0.01  | 0.08 | <0.03           | 0.55  | 99.37  | 0.90  | 88.8 |
| 21 | LVR-31 | 53.46            | 0.06             | 1.23                           | 8.71                           | 0.90                           | 7.83  | 0.17 | 33.01 | 0.87 | <0.05             | 0.00             | 0.01                          | 0.01                          | <0.01 | 0.09 | 0.07            | 0.51  | 99.04  | 0.92  | 88.3 |
| 22 | LVR-32 | 54.69            | 0.07             | 1.42                           | 8.38                           | 0.81                           | 7.54  | 0.16 | 32.53 | 1.11 | <0.05             | 0.02             | 0.01                          | 0.01                          | <0.01 | 0.07 | 0.08            | 0.00  | 99.38  | 0.89  | 88.5 |
| 23 | LVR-33 | 54.94            | 0.08             | 1.46                           | 8.44                           | 0.84                           | 7.59  | 0.17 | 32.67 | 1.28 | <0.05             | 0.01             | 0.01                          | 0.01                          | <0.01 | 0.08 | <0.03           | -0.05 | 99.97  | 0.89  | 88.5 |
| 24 | LVR-34 | 54.42            | 0.09             | 1.56                           | 8.77                           | 0.86                           | 7.89  | 0.18 | 31.87 | 1.68 | <0.05             | 0.01             | 0.01                          | 0.01                          | <0.01 | 0.08 | <0.03           | 0.22  | 99.82  | 0.87  | 87.8 |
| 25 | LVR-35 | 38.03            | 0.10             | 2.11                           | 13.97                          | 3.28                           | 12.57 | 0.14 | 35.10 | 0.09 | 0.08              | 0.02             | 0.02                          | 0.02                          | 0.01  | 0.24 | <0.03           | 6.64  | 99.87  | 1.38  | 83.3 |
| 26 | LVR-36 | 54.21            | 0.08             | 1.52                           | 9.15                           | 0.77                           | 8.24  | 0.19 | 31.94 | 1.33 | <0.05             | 0.01             | 0.01                          | 0.01                          | <0.01 | 0.08 | <0.03           | 0.13  | 99.44  | 0.88  | 87.4 |
| 27 | LVR-37 | 53.26            | 0.12             | 2.49                           | 10.60                          | 0.73                           | 9.54  | 0.22 | 29.47 | 1.66 | 0.05              | 0.02             | 0.01                          | 0.01                          | 0.01  | 0.07 | <0.03           | 0.48  | 99.25  | 0.82  | 84.6 |
| 28 | LVR-39 | 54.48            | 0.09             | 1.97                           | 8.64                           | 0.75                           | 7.77  | 0.17 | 31.51 | 1.91 | 0.07              | 0.03             | 0.01                          | 0.01                          | 0.01  | 0.08 | <0.03           | 0.00  | 99.78  | 0.86  | 87.8 |
| 29 | LVR-40 | 54.22            | 0.09             | 1.77                           | 8.33                           | 0.84                           | 7.49  | 0.17 | 31.80 | 1.61 | <0.05             | 0.02             | 0.01                          | 0.01                          | 0.01  | 0.08 | <0.03           | 0.15  | 99.17  | 0.87  | 88.3 |

|    |        |       |      |      |      |      |      |      |       |      |       |      |      |      |       |      |       |       |       |      |      |
|----|--------|-------|------|------|------|------|------|------|-------|------|-------|------|------|------|-------|------|-------|-------|-------|------|------|
| 30 | LVR-41 | 54.48 | 0.07 | 1.39 | 9.00 | 0.75 | 8.10 | 0.19 | 32.28 | 1.21 | <0.05 | 0.01 | 0.01 | 0.01 | <0.01 | 0.08 | <0.03 | 0.03  | 99.53 | 0.88 | 87.7 |
| 31 | LVR-43 | 54.63 | 0.09 | 1.94 | 8.48 | 0.75 | 7.63 | 0.17 | 31.44 | 1.96 | 0.09  | 0.04 | 0.01 | 0.01 | 0.01  | 0.08 | 0.08  | 0.12  | 99.89 | 0.86 | 88.0 |
| 32 | LVR-44 | 54.10 | 0.10 | 2.15 | 8.61 | 0.87 | 7.75 | 0.17 | 30.98 | 2.01 | 0.12  | 0.05 | 0.01 | 0.01 | 0.01  | 0.08 | <0.03 | -0.03 | 99.28 | 0.85 | 87.7 |
| 33 | LVR-45 | 54.19 | 0.11 | 2.23 | 8.46 | 0.92 | 7.61 | 0.17 | 30.99 | 2.19 | 0.13  | 0.06 | 0.01 | 0.01 | 0.01  | 0.08 | <0.03 | 0.08  | 99.68 | 0.85 | 87.9 |

---

Results of XRF analyses are expressed in weight percent. LOI: Loss on ignition. Mg# =  $100 \text{ MgO}/(\text{MgO} + \text{FeO}_{\text{tot}})$ , expressed as a molar ratio.

SUPPLEMENTARY TABLE S12. BULK COMPOSITIONS OF MEMBERS OF THE LYAVARAKA COMPLEX:  
MINOR AND TRACE ELEMENTS

| #  | Sample | Sc   | V     | Cr      | Co    | Ni     | Cu    | Zn    | Rb   | Sr    | Y   | Zr   | Nb  | Cs   | Ba    |
|----|--------|------|-------|---------|-------|--------|-------|-------|------|-------|-----|------|-----|------|-------|
| 1  | LVR-1  | 25.7 | 94.9  | 4278.3  | 84.9  | 589.3  | 121.4 | 295.6 | 0.9  | 8.0   | 3.4 | 9.1  | 0.4 | <0.1 | 5.8   |
| 2  | LVR-2  | 12.2 | 35.8  | 5322.3  | 88.2  | 848.0  | <5    | 47.3  | 1.0  | 7.2   | 0.4 | 1.2  | 0.1 | <0.1 | 4.4   |
| 3  | LVR-5  | 22.4 | 76.6  | 5375.9  | 75.4  | 730.0  | <5    | 74.1  | 1.6  | 6.9   | 3.0 | 6.0  | 0.1 | <0.1 | 3.3   |
| 4  | LVR-7  | 16.8 | 61.1  | 4545.9  | 84.0  | 697.5  | 32.9  | 61.0  | 1.0  | 8.8   | 1.6 | 8.7  | 0.5 | <0.1 | <3    |
| 5  | LVR-8  | 19.1 | 63.8  | 4448.9  | 81.8  | 609.6  | 21.2  | 50.7  | 0.9  | 4.7   | 2.2 | 8.7  | 0.1 | <0.1 | <3    |
| 6  | LVR-11 | 17.9 | 60.6  | 4720.3  | 80.8  | 637.8  | 45.3  | 63.4  | 1.1  | 7.8   | 1.8 | 5.9  | 0.2 | <0.1 | <3    |
| 7  | LVR-13 | 12.9 | 44.0  | 5831.1  | 92.5  | 822.7  | 6.2   | 47.4  | 1.6  | <3    | 0.5 | 0.9  | 0.1 | <0.1 | <3    |
| 8  | LVR-14 | 15.2 | 62.1  | 3563.6  | 85.2  | 514.9  | 686.6 | 89.1  | 1.1  | 5.5   | 1.6 | 5.8  | 0.1 | <0.1 | <3    |
| 9  | LVR-15 | 13.2 | 42.9  | 6365.6  | 84.2  | 746.5  | <5    | 51.2  | 0.9  | 3.5   | 0.6 | 1.3  | 0.1 | <0.1 | <3    |
| 10 | LVR-16 | 13.0 | 48.0  | 5470.6  | 78.8  | 822.4  | 13.8  | 49.7  | 1.0  | 3.2   | 0.6 | 2.3  | 0.1 | <0.1 | <3    |
| 11 | LVR-17 | 13.9 | 43.4  | 6372.5  | 81.0  | 700.0  | 5.5   | 52.7  | 1.0  | <3    | 0.7 | 1.4  | 0.1 | <0.1 | <3    |
| 12 | LVR-18 | 20.1 | 88.2  | 4660.4  | 79.0  | 937.4  | 26.0  | 59.5  | 6.1  | 78.0  | 3.7 | 22.8 | 0.9 | <0.1 | 73.5  |
| 13 | LVR-19 | 18.5 | 89.6  | 4056.6  | 75.0  | 825.5  | 19.0  | 56.9  | 7.6  | 149   | 4.7 | 30.8 | 1.0 | 0.12 | 92.6  |
| 14 | LVR-20 | 18.9 | 90.3  | 4308.2  | 74.4  | 853.2  | 31.0  | 54.1  | 10.4 | 73.9  | 4.4 | 26.5 | 0.8 | 0.15 | 90.3  |
| 15 | LVR-21 | 26.9 | 121.2 | 2947.4  | 73.4  | 719.3  | 33.0  | 57.8  | 11.5 | 104.7 | 6.6 | 37.9 | 1.4 | 0.12 | 145.5 |
| 16 | LVR-22 | 30.6 | 97.9  | 3817.6  | 77.0  | 743.2  | 10.6  | 196.8 | 0.9  | 10.1  | 3.7 | 8.8  | 0.4 | <0.1 | 12.1  |
| 17 | LVR-23 | 13.9 | 124.2 | 12862.0 | 116.7 | 1530.2 | 9.7   | 574.8 | 2.1  | 5.9   | 0.7 | 7.6  | 0.1 | <0.1 | <3    |
| 18 | LVR-25 | 16.4 | 60.0  | 4719.1  | 84.4  | 601.8  | 7.0   | 148.5 | 1.3  | <3    | 1.0 | 4.4  | 0.3 | <0.1 | <3    |
| 19 | LVR-28 | 28.5 | 167.9 | 2580.8  | 94.0  | 910.5  | 30.0  | 83.2  | 9.5  | 108.2 | 7.4 | 23.3 | 1.2 | 0.19 | 91.0  |
| 20 | LVR-29 | 13.5 | 45.4  | 5405.6  | 85.6  | 803.8  | 7.0   | 46.9  | 1.1  | <3    | 0.8 | 1.1  | 0.1 | <0.1 | <3    |
| 21 | LVR-31 | 12.1 | 44.9  | 5794.2  | 93.2  | 811.5  | 7.6   | 48.2  | 1.1  | <3    | 0.6 | 0.8  | 0.1 | <0.1 | <3    |
| 22 | LVR-32 | 13.4 | 40.8  | 5228.6  | 85.0  | 694.9  | <5    | 46.7  | 1.2  | 5.6   | 0.6 | 1.6  | 0.1 | <0.1 | 4.5   |
| 23 | LVR-33 | 13.4 | 44.0  | 5429.4  | 83.5  | 725.1  | 14.6  | 50.2  | 1.2  | <3    | 0.9 | 1.6  | 0.1 | <0.1 | <3    |
| 24 | LVR-34 | 16.1 | 50.4  | 5565.2  | 88.9  | 792.5  | <5    | 45.5  | 0.9  | 8.7   | 0.9 | 1.6  | 0.3 | <0.1 | <3    |
| 25 | LVR-35 | 9.8  | 91.3  | 18940.5 | 143.3 | 2401.2 | <5    | 132.4 | 6.3  | <3    | 0.3 | 2.3  | 0.2 | <0.1 | <3    |
| 26 | LVR-36 | 18.3 | 56.4  | 5003.6  | 88.6  | 737.0  | 5.4   | 54.0  | 1.3  | <3    | 0.7 | 1.2  | 0.1 | <0.1 | <3    |
| 27 | LVR-37 | 17.3 | 86.6  | 4790.1  | 96.4  | 665.8  | 11.8  | 86.5  | 1.3  | 4.7   | 1.4 | 6.1  | 0.2 | <0.1 | <3    |
| 28 | LVR-39 | 17.3 | 60.7  | 4912.4  | 84.7  | 763.7  | 11.0  | 39.6  | 2.0  | 7.0   | 1.5 | 4.4  | 0.2 | <0.1 | 10.6  |

|    |        |      |      |        |      |       |      |      |     |     |     |     |     |      |      |
|----|--------|------|------|--------|------|-------|------|------|-----|-----|-----|-----|-----|------|------|
| 29 | LVR-40 | 17.6 | 57.4 | 5694.4 | 84.6 | 769.3 | 10.9 | 46.  | 1.4 | 6.3 | 1.0 | 2.3 | 0.1 | <0.1 | <3   |
| 30 | LVR-41 | 16.0 | 49.8 | 4904.4 | 88.3 | 729.1 | 5.9  | 72.6 | 1.1 | <3  | 0.7 | 0.7 | 0.1 | <0.1 | 3.1  |
| 31 | LVR-43 | 17.7 | 56.7 | 4830.1 | 82.0 | 775.2 | 6.0  | 43.8 | 2.5 | 7.3 | 1.3 | 4.0 | 0.2 | <0.1 | 12.2 |
| 32 | LVR-44 | 16.9 | 64.6 | 5679.9 | 81.0 | 763.3 | 9.7  | 47.7 | 2.3 | 7.5 | 1.3 | 5.9 | 0.3 | 0.12 | 15.0 |
| 33 | LVR-45 | 17.4 | 62.9 | 5922.0 | 81.1 | 781.2 | 11.5 | 50.8 | 2.8 | 8.0 | 1.6 | 6.2 | 0.3 | 0.12 | 19.5 |

---



SUPPLEMENTARY TABLE S12 (continued). BULK COMPOSITIONS OF MEMBERS OF THE LYAVARAKA COMPLEX:  
MINOR AND TRACE ELEMENTS

| #  | Sample | La   | Ce    | Pr   | Nd   | Sm   | Eu   | Gd   | Tb   | Dy   | Ho   | Er   | Tm   | Yb   | Lu   | Hf    | Th   | U     | (Gd /<br>Yb) <sub>N</sub> | Eu /<br>Eu* |
|----|--------|------|-------|------|------|------|------|------|------|------|------|------|------|------|------|-------|------|-------|---------------------------|-------------|
| 1  | LVR1   | 1.73 | 3.68  | 0.46 | 1.87 | 0.39 | 0.13 | 0.43 | 0.08 | 0.47 | 0.10 | 0.30 | 0.04 | 0.26 | 0.04 | 0.19  | 0.35 | 0.03  | 1.35                      | 0.99        |
| 2  | LVR2   | 0.19 | 0.28  | 0.03 | 0.13 | 0.03 | 0.01 | 0.05 | 0.01 | 0.05 | 0.01 | 0.04 | 0.01 | 0.06 | 0.01 | 0.05  | 0.03 | 0.03  | 0.66                      | 1.01        |
| 3  | LVR5   | 1.09 | 2.72  | 0.39 | 1.70 | 0.40 | 0.13 | 0.42 | 0.06 | 0.41 | 0.09 | 0.28 | 0.05 | 0.27 | 0.04 | 0.15  | 0.19 | 0.03  | 1.23                      | 0.94        |
| 4  | LVR7   | 0.93 | 1.92  | 0.22 | 0.90 | 0.18 | 0.04 | 0.22 | 0.03 | 0.21 | 0.05 | 0.15 | 0.03 | 0.18 | 0.03 | 0.22  | 0.16 | 0.03  | 0.97                      | 0.69        |
| 5  | LVR8   | 1.24 | 2.67  | 0.30 | 1.20 | 0.27 | 0.08 | 0.28 | 0.05 | 0.31 | 0.07 | 0.21 | 0.03 | 0.21 | 0.03 | 0.22  | 0.23 | <0.02 | 1.07                      | 0.83        |
| 6  | LVR11  | 0.66 | 1.71  | 0.24 | 0.93 | 0.25 | 0.08 | 0.21 | 0.04 | 0.26 | 0.06 | 0.19 | 0.03 | 0.18 | 0.03 | 0.16  | 0.13 | 0.03  | 0.92                      | 1.03        |
| 7  | LVR13  | 0.09 | 0.18  | 0.02 | 0.11 | 0.03 | 0.01 | 0.04 | 0.01 | 0.07 | 0.02 | 0.06 | 0.01 | 0.08 | 0.01 | 0.05  | 0.03 | <0.02 | 0.46                      | 0.55        |
| 8  | LVR14  | 0.69 | 1.67  | 0.25 | 1.09 | 0.28 | 0.04 | 0.22 | 0.04 | 0.24 | 0.05 | 0.16 | 0.03 | 0.16 | 0.03 | 0.15  | 0.19 | 0.03  | 1.14                      | 0.52        |
| 9  | LVR15  | 0.13 | 0.27  | 0.03 | 0.16 | 0.05 | 0.02 | 0.06 | 0.01 | 0.08 | 0.02 | 0.07 | 0.01 | 0.09 | 0.01 | 0.05  | 0.03 | <0.02 | 0.58                      | 0.93        |
| 10 | LVR16  | 0.12 | 0.30  | 0.04 | 0.20 | 0.07 | 0.02 | 0.07 | 0.01 | 0.07 | 0.02 | 0.07 | 0.01 | 0.10 | 0.02 | 0.05  | 0.05 | <0.02 | 0.59                      | 0.75        |
| 11 | LVR17  | 0.10 | 0.21  | 0.03 | 0.14 | 0.04 | 0.02 | 0.06 | 0.01 | 0.07 | 0.02 | 0.06 | 0.01 | 0.08 | 0.02 | 0.05  | 0.03 | <0.02 | 0.60                      | 0.99        |
| 12 | LVR18  | 3.89 | 7.51  | 0.87 | 3.22 | 0.58 | 0.18 | 0.64 | 0.11 | 0.68 | 0.13 | 0.41 | 0.06 | 0.38 | 0.06 | 0.54  | 0.71 | 0.09  | 1.37                      | 0.88        |
| 13 | LVR19  | 5.35 | 10.18 | 1.20 | 4.19 | 0.70 | 0.23 | 0.73 | 0.13 | 0.84 | 0.15 | 0.45 | 0.07 | 0.45 | 0.06 | 0.80  | 0.87 | 0.09  | 1.32                      | 0.95        |
| 14 | LVR20  | 4.57 | 8.67  | 1.03 | 3.80 | 0.79 | 0.20 | 0.76 | 0.11 | 0.67 | 0.14 | 0.41 | 0.07 | 0.42 | 0.07 | 0.65  | 0.93 | 0.09  | 1.47                      | 0.76        |
| 15 | LVR21  | 6.74 | 12.49 | 1.56 | 5.35 | 1.26 | 0.34 | 1.13 | 0.18 | 1.09 | 0.24 | 0.63 | 0.10 | 0.64 | 0.09 | 1.03  | 1.19 | 0.15  | 1.42                      | 0.85        |
| 16 | LVR22  | 1.04 | 2.59  | 0.36 | 1.43 | 0.40 | 0.09 | 0.44 | 0.08 | 0.49 | 0.12 | 0.36 | 0.06 | 0.41 | 0.06 | 0.24  | 0.16 | 0.03  | 0.87                      | 0.67        |
| 17 | LVR23  | 0.56 | 1.10  | 0.13 | 0.52 | 0.10 | 0.02 | 0.09 | 0.02 | 0.11 | 0.02 | 0.08 | 0.02 | 0.10 | 0.02 | 0.18  | 0.06 | <0.02 | 0.75                      | 0.50        |
| 18 | LVR25  | 0.37 | 0.72  | 0.08 | 0.33 | 0.10 | 0.03 | 0.11 | 0.02 | 0.12 | 0.03 | 0.10 | 0.02 | 0.11 | 0.02 | 0.12  | 0.22 | 0.03  | 0.85                      | 0.85        |
| 19 | LVR28  | 4.13 | 9.04  | 1.15 | 4.75 | 1.02 | 0.37 | 1.29 | 0.19 | 1.27 | 0.26 | 0.72 | 0.11 | 0.72 | 0.10 | 0.67  | 0.68 | 0.14  | 1.45                      | 0.97        |
| 20 | LVR29  | 0.11 | 0.25  | 0.03 | 0.11 | 0.03 | 0.01 | 0.05 | 0.01 | 0.06 | 0.02 | 0.06 | 0.01 | 0.07 | 0.01 | 0.05  | 0.03 | <0.02 | 0.53                      | 0.99        |
| 21 | LVR31  | 0.09 | 0.18  | 0.02 | 0.09 | 0.03 | 0.01 | 0.04 | 0.01 | 0.06 | 0.02 | 0.06 | 0.01 | 0.07 | 0.01 | 0.05  | 0.03 | <0.02 | 0.54                      | 1.08        |
| 22 | LVR32  | 0.81 | 1.89  | 0.22 | 0.67 | 0.08 | 0.03 | 0.07 | 0.01 | 0.07 | 0.02 | 0.07 | 0.01 | 0.09 | 0.01 | 0.05  | 0.03 | 0.03  | 0.62                      | 1.28        |
| 23 | LVR33  | 0.19 | 0.43  | 0.05 | 0.17 | 0.05 | 0.02 | 0.08 | 0.01 | 0.08 | 0.02 | 0.08 | 0.02 | 0.10 | 0.02 | 0.05  | 0.03 | <0.02 | 0.60                      | 1.02        |
| 24 | LVR34  | 0.45 | 0.99  | 0.11 | 0.46 | 0.11 | 0.04 | 0.13 | 0.02 | 0.14 | 0.03 | 0.11 | 0.02 | 0.12 | 0.02 | 0.05  | 0.06 | <0.02 | 0.88                      | 1.02        |
| 25 | LVR35  | 0.13 | 0.21  | 0.02 | 0.08 | 0.03 | 0.01 | 0.03 | 0.01 | 0.04 | 0.01 | 0.05 | 0.01 | 0.08 | 0.01 | ≤0.05 | 0.03 | <0.02 | 0.41                      | 1.09        |
| 26 | LVR36  | 0.07 | 0.17  | 0.03 | 0.13 | 0.04 | 0.02 | 0.04 | 0.01 | 0.05 | 0.01 | 0.04 | 0.01 | 0.08 | 0.01 | 0.06  | 0.14 | 0.03  | 0.36                      | 0.94        |
| 27 | LVR37  | 0.58 | 1.54  | 0.23 | 0.93 | 0.22 | 0.06 | 0.25 | 0.04 | 0.20 | 0.05 | 0.13 | 0.02 | 0.14 | 0.02 | 0.15  | 0.16 | <0.02 | 1.42                      | 0.78        |

|    |       |      |      |      |      |      |      |      |      |      |      |      |      |      |      |      |      |       |      |      |
|----|-------|------|------|------|------|------|------|------|------|------|------|------|------|------|------|------|------|-------|------|------|
| 27 | LVR39 | 0.41 | 0.91 | 0.11 | 0.51 | 0.16 | 0.05 | 0.20 | 0.04 | 0.24 | 0.05 | 0.14 | 0.02 | 0.13 | 0.02 | 0.10 | 0.12 | <0.02 | 1.18 | 0.84 |
| 29 | LVR40 | 0.36 | 0.83 | 0.10 | 0.36 | 0.09 | 0.03 | 0.09 | 0.02 | 0.12 | 0.03 | 0.11 | 0.02 | 0.14 | 0.02 | 0.07 | 0.03 | 0.03  | 0.49 | 1.02 |
| 30 | LVR41 | 0.13 | 0.21 | 0.03 | 0.11 | 0.03 | 0.01 | 0.03 | 0.01 | 0.04 | 0.01 | 0.04 | 0.01 | 0.08 | 0.01 | 0.05 | 0.03 | <0.02 | 0.34 | 0.88 |
| 31 | LVR43 | 0.66 | 1.37 | 0.17 | 0.60 | 0.15 | 0.04 | 0.15 | 0.03 | 0.18 | 0.04 | 0.12 | 0.02 | 0.16 | 0.03 | 0.10 | 0.13 | 0.03  | 0.75 | 0.77 |
| 32 | LVR44 | 0.66 | 1.59 | 0.21 | 0.81 | 0.17 | 0.05 | 0.15 | 0.03 | 0.17 | 0.04 | 0.12 | 0.02 | 0.16 | 0.03 | 0.14 | 0.19 | 0.03  | 0.75 | 1.00 |
| 33 | LVR45 | 0.78 | 1.80 | 0.22 | 0.87 | 0.20 | 0.04 | 0.20 | 0.03 | 0.20 | 0.05 | 0.16 | 0.03 | 0.18 | 0.03 | 0.15 | 0.19 | 0.03  | 0.88 | 0.62 |

---

These samples were analyzed using high-resolution inductively coupled plasma – mass spectrometry (ICP–MS); results are expressed in parts per million.
